# Supplementary material
Source: PubMed Central journal article supplement (PMC11366264)
Supplement: NIHMS2011085-supplement-Montoya_et_al_Suppl__Mat_Carbohydr_Res_2024.pdf [file NIHMS2011085-supplement-Montoya_et_al_Suppl__Mat_Carbohydr_Res_2024.pdf]

## *Supplementary Material*

### **Big is not better: Comparing two alpha-Gal-bearing glycotopes in neoglycoproteins as biomarkers for *Leishmania (Viannia) braziliensis* infection**

Alba L. Montoya<sup>a,1</sup>, Eileni R. Gil<sup>a,1</sup>, Irodiel Vinales<sup>a,1</sup>, Igor L. Estevo<sup>b</sup>, Paola Taboada<sup>b</sup>, Mary Cruz Torrico<sup>c</sup>, Faustino Torrico<sup>c</sup>, Jorge Diego Marco<sup>d</sup>, Igor C. Almeida<sup>b,\*</sup>, and Katja Michael<sup>a,\*</sup>

<sup>a</sup> *Department of Chemistry and Biochemistry, and Border Biomedical Research Center, University of Texas at El Paso, 500 West University Avenue, El Paso, Texas, 79968, U.S.A.*

<sup>b</sup> *Department of Biological Sciences, and Border Biomedical Research Center, University of Texas at El Paso, 500 West University Avenue, El Paso, Texas, 79968, U.S.A.*

<sup>c</sup> *Universidad Mayor de San Simón, Faculty of Medicine, and Fundación CEADES, Cochabamba, Bolivia*

<sup>d</sup> *Universidad Nacional de Salta (UNSa)-Consejo Nacional de Investigaciones Científicas y Técnicas (CONICET), Instituto de Patología Experimental, Facultad de Ciencias de la Salud, Universidad Nacional de Salta, Salta, Argentina*

\* Corresponding authors.

*E-mail addresses:* [kmichael@utep.edu](mailto:kmichael@utep.edu) (Katja Michael); [icalmeida@utep.edu](mailto:icalmeida@utep.edu) (Igor C. Almeida)

<sup>1</sup> These authors contributed equally to this work.

## TABLE OF CONTENTS

| Content                                                                                                                                                       | Page  |
|---------------------------------------------------------------------------------------------------------------------------------------------------------------|-------|
| General Information                                                                                                                                           | S3    |
| Abbreviations used                                                                                                                                            | S4-S5 |
| <b>Figure S1:</b> MALDI-TOF-MS of <b>NGP28b</b> and experimental details                                                                                      | S6    |
| <b>Figure S2:</b> Cross-titration ELISA for <b>NGP28b</b> , <b>NGP31b</b> , and <b>2ME-BSA</b> varying antigen quantity [ng/well] and dilution of pooled sera | S7    |
| <b>Figure S3:</b> <sup>1</sup> H NMR spectrum of compound <b>4</b>                                                                                            | S8    |
| <b>Figure S4:</b> <sup>13</sup> C NMR spectrum of compound <b>4</b>                                                                                           | S9    |
| <b>Figure S5:</b> Mass spectrum of compound <b>4</b>                                                                                                          | S10   |
| <b>Figure S6:</b> <sup>1</sup> H NMR spectrum of compound <b>5</b>                                                                                            | S11   |
| <b>Figure S7:</b> <sup>13</sup> C NMR spectrum of compound <b>5</b>                                                                                           | S12   |
| <b>Figure S8:</b> Mass spectrum of compound <b>5</b>                                                                                                          | S13   |
| <b>Figure S9:</b> <sup>1</sup> H NMR spectrum of compound <b>7</b>                                                                                            | S14   |
| <b>Figure S10:</b> <sup>13</sup> C NMR spectrum of compound <b>7</b>                                                                                          | S15   |
| <b>Figure S11:</b> Mass spectrum of compound <b>7</b>                                                                                                         | S16   |
| <b>Figure S12:</b> <sup>1</sup> H NMR spectrum of compound <b>8</b>                                                                                           | S17   |
| <b>Figure S13:</b> <sup>13</sup> C NMR spectrum of compound <b>8</b>                                                                                          | S18   |
| <b>Figure S14:</b> COSY NMR spectrum of compound <b>8</b>                                                                                                     | S19   |
| <b>Figure S15:</b> HSQC NMR spectrum of compound <b>8</b>                                                                                                     | S20   |
| <b>Figure S16:</b> Mass spectrum of compound <b>8</b>                                                                                                         | S21   |
| <b>Figure S17:</b> <sup>1</sup> H NMR spectrum of compound <b>9</b>                                                                                           | S22   |
| <b>Figure S18:</b> <sup>13</sup> C NMR spectrum of compound <b>9</b>                                                                                          | S23   |
| <b>Figure S19:</b> HSQC NMR spectrum of compound <b>9</b>                                                                                                     | S24   |
| <b>Figure S20:</b> Mass spectrum of compound <b>9</b>                                                                                                         | S25   |
| <b>Figure S21:</b> <sup>1</sup> H NMR spectrum of compound <b>10</b>                                                                                          | S26   |
| <b>Figure S22:</b> <sup>13</sup> C NMR spectrum of compound <b>10</b>                                                                                         | S27   |
| <b>Figure S23:</b> HSQC NMR spectrum of compound <b>10</b>                                                                                                    | S28   |
| <b>Figure S24:</b> Mass spectrum of compound <b>10</b>                                                                                                        | S29   |
| <b>Figure S25:</b> <sup>1</sup> H NMR spectrum of <b>G31<sub>SH</sub></b>                                                                                     | S30   |
| <b>Figure S26:</b> <sup>13</sup> C NMR spectrum of <b>G31<sub>SH</sub></b>                                                                                    | S31   |
| <b>Figure S27:</b> HSQC NMR spectrum of <b>G31<sub>SH</sub></b>                                                                                               | S32   |
| <b>Figure S28:</b> Mass spectrum of <b>G31<sub>SH</sub></b>                                                                                                   | S33   |
| <b>Supplementary Table 1:</b> Tegumentary leishmaniasis cohort                                                                                                | S34   |
| <b>Supplementary Table 2:</b> Chagas disease cohort                                                                                                           | S35   |
| <b>Supplementary Table 3:</b> Negative controls cohort (non TL, non CD)                                                                                       | S36   |



## GENERAL INFORMATION

All chemicals were purchased as reagent grade from Thermo Fisher Scientific, Sigma-Aldrich, or Acros Organic, and used without further purification. The ACS grade solvents used for reactions were obtained from Thermo Fisher Scientific and they were distilled from the appropriate drying agents. Molecular sieves (3 Å and 4 Å) were purchased from Alfa Aesar and Thermo Fisher Scientific, respectively, and activated under high vacuum and heat prior to use. Reactions were performed under an argon atmosphere, strictly anhydrous conditions and monitored by TLC on silica gel 60 F254 plates from EMD Millipore or Dynamic Adsorbents, Inc. Spots were detected under UV light (254 nm) and/or by charring with 4% sulfuric acid in ethanol. The purification of the compounds was performed by flash column chromatography on silica gel (40-60 µm) from Thermo Fisher Scientific, and the ratio between silica and crude product ranged from 50:1 to 120:1 (dry w/w). FPLC purifications were performed with an AKTA Purifier 100 FPLC system from Cytiva (former GE Healthcare) using a Resource RPC column with a stationary phase of 15 µm polystyrene/divinylbenzene beads, solvent A: 2% CH<sub>3</sub>CN/H<sub>2</sub>O; solvent B: 85% CH<sub>3</sub>CN/H<sub>2</sub>O. <sup>1</sup>H and <sup>13</sup>C NMR spectra were recorded on a Bruker Avance III HD 400 MHz NMR spectrometer at 400 and 101 MHz. Chemical shifts (in ppm) were determined relative to tetramethylsilane (δ 0.00 ppm) as an internal standard in CDCl<sub>3</sub>, or relative to the CDCl<sub>3</sub> signal (δ 77.0 ppm) in <sup>13</sup>C NMR spectra. In case of spectra measured in D<sub>2</sub>O, a solution of tetramethylsilane in CDCl<sub>3</sub> in a sealed capillary was used as an external standard for calibration. Coupling constant(s) [Hz] were measured from one-dimensional <sup>1</sup>H-NMR spectra. Full or partial assignments were made by 1D spectra as well as standard COSY, HSQC, and TOCSY experiments. In disaccharides and tetrasaccharides, protons of galactopyranose are labeled with an italicized “*p*”, protons of galactofuranose with an italicized “*f*” and protons of mannose with “*m*”. Protons in the allyl group are labeled as “*a*” for the sp<sup>3</sup>-hybridized CH<sub>2</sub>, “*b*” for the sp<sup>2</sup>-hybridized CH, and “*c*” for the terminal sp<sup>2</sup>-hybridized CH<sub>2</sub>. MS analyses of the carbohydrate derivatives were performed on a high-resolution JEOL AccuTOF mass spectrometer using an electrospray ionization (ESI) source. The thiol-ene reactions were performed in a Rayonet RPR200 photochemical reactor (Southern New England Ultraviolet Company, Branford, CT) equipped with 16 UV lamps (350 nm). Bovine serum albumin (BSA) and BSA derivatives (neoglycoproteins (NGPs) and 2-mercaptoethanol-BSA) were measured by matrix-assisted laser/desorption/ionization mass spectrometer (MALDI)-TOF-MS (MALDI-8020, Shimadzu) using 10 mg/mL sinapinic acid, 0.1% trifluoroacetic acid, in 50% acetonitrile as a matrix. Polystyrene Nunc MaxiSorp 96-well ELISA plates, and chemiluminescent ELISA reagents were purchased from Thermo Fisher Scientific or Jackson ImmunoResearch, and chemiluminescence was recorded on a Luminoskan Ascent, Thermo Fisher Scientific. Optical rotations were measured on an ATAGO AP-300 Automatic Polarimeter.

## ABBREVIATIONS USED

|                                    |                                                                          |
|------------------------------------|--------------------------------------------------------------------------|
| Å                                  | angstrom                                                                 |
| Abs                                | antibodies                                                               |
| Ac                                 | acetyl                                                                   |
| Ac <sub>2</sub> O                  | acetic anhydride                                                         |
| AcSH                               | thiolacetic acid                                                         |
| AgOTf                              | silver trifluoromethanesulfonate                                         |
| AIBN                               | azobisisobutyronitrile                                                   |
| All                                | allyl                                                                    |
| AlOH                               | allyl alcohol                                                            |
| Ar                                 | argon                                                                    |
| BF <sub>3</sub> ·Et <sub>2</sub> O | boron trifluoride etherate                                               |
| BMK                                | biomarker                                                                |
| BSA                                | bovine serum albumin                                                     |
| Bz                                 | benzoyl                                                                  |
| BzCl                               | benzoyl chloride                                                         |
| CCl <sub>3</sub> CN                | trichloroacetonitrile                                                    |
| CD                                 | Chagas disease                                                           |
| cELISA                             | chemiluminescent enzyme-linked immunosorbent assay                       |
| CL                                 | cutaneous leishmaniasis                                                  |
| DBU                                | 1,8-diazabicyclo[5.4.0]undec-7-ene                                       |
| DCM                                | methylene dichloride                                                     |
| DL                                 | disseminated leishmaniasis                                               |
| DMAP                               | 4-Dimethylaminopyridine                                                  |
| DPAP                               | 2,2-dimethoxy-2-phenylacetophenone                                       |
| ELISA                              | enzyme-linked immunosorbent assay                                        |
| equiv.                             | equivalent                                                               |
| ESI-TOF HRMS                       | electrospray ionization time-of-flight high-resolution mass spectrometry |
| Et <sub>3</sub> N                  | triethylamine                                                            |
| EtOAc                              | ethyl acetate                                                            |
| EtSH                               | ethanethiol                                                              |
| FPLC                               | Fast protein liquid chromatography                                       |
| GIPL                               | glycoinositolphospholipid                                                |
| GPI                                | glycosylphosphatidylinositol                                             |
| GU                                 | glycan unit                                                              |
| MALDI-TOF                          | matrix-assisted laser desorption ionization time-of-flight               |
| MeOH                               | methanol                                                                 |
| ML                                 | mucosal leishmaniasis                                                    |
| MS                                 | molecular sieves                                                         |
| <i>m/z</i>                         | mass-to-charge ratio                                                     |
| NGP                                | neoglycoprotein                                                          |
| NHS                                | normal human serum                                                       |
| NIS                                | N-iodosuccinimide                                                        |
| NMR                                | nuclear magnetic resonance                                               |
| PCR                                | polymerase chain reaction                                                |

|          |                                                                                             |
|----------|---------------------------------------------------------------------------------------------|
| PTLC     | preparative thin-layer chromatography                                                       |
| PTSA     | para-toluenesulfonic acid                                                                   |
| quant.   | quantitative                                                                                |
| RLU      | relative luminescence unit(s)                                                               |
| rt       | room temperature                                                                            |
| SL       | subclinical asymptomatic leishmaniasis                                                      |
| tBu      | tert-butyl                                                                                  |
| TCEP     | tris(2-carboxyethyl)phosphine                                                               |
| TFA      | trifluoroacetic acid                                                                        |
| tGPI-MUC | <i>Trypanosoma cruzi</i> trypomastigote-derived glycosylphosphatidylinositol-anchored mucin |
| TL       | tegumentary leishmaniasis                                                                   |
| TLC      | thin-layer chromatography                                                                   |
| ToISH    | para-thiocresol                                                                             |
| THF      | tetrahydrofuran                                                                             |

## MALDI-TOF-MS of NGP28b

To determine the average molecular masses of BSA and **NGP28b**, 1  $\mu\text{L}$  of BSA solution (0.4 mg/mL in  $\text{H}_2\text{O}$ ) was mixed with 1  $\mu\text{L}$  NGP31b solution (1 mg/mL in  $\text{H}_2\text{O}$ ) and 2  $\mu\text{L}$  matrix solution (10 mg/mL sinapinic acid in 50% acetonitrile with 0.1% TFA) in a 1.5-mL microcentrifuge tube. Mass spectra were obtained by matrix-assisted laser/desorption ionization (MALDI-TOF-MS) using a Shimadzu MALDI-8020 MS configured in linear mode. The instrument employed dithering across a scan range of 10,000 to 100,000  $m/z$ . The parameters for data acquisition were set as follows: the laser power was adjusted to 110 units; the laser repetition rate was fixed at 50 Hz; each spectrum was the result of 5 accumulated shots, with an additional 2 blast shots to clean the plate; 200 spectral profiles were averaged; the pulse extraction was precisely set to a value of 66431; and a blanking mass was applied to exclude ions below  $m/z$  15,000. For data processing, the Threshold Apex software by Shimadzu was utilized, applying a constant threshold value for peak detection, Gaussian smoothing with a filter width of 200 for noise reduction, and setting the peak width at 2 to finely resolve the spectral peaks. Calibration of the mass spectrometer was meticulously performed using the Pierce Bovine Serum Albumin Standard Ampules with a concentration of 2 mg/mL (provided by Thermo Fisher Scientific, catalog number 23209). An internal calibration was established by setting the mass of the  $[\text{BSA} + \text{H}]^+$  ion at  $m/z$  66,402 with an exceptionally tight mass tolerance of 5 ppm to ensure high precision in mass measurements (Fig. S1).

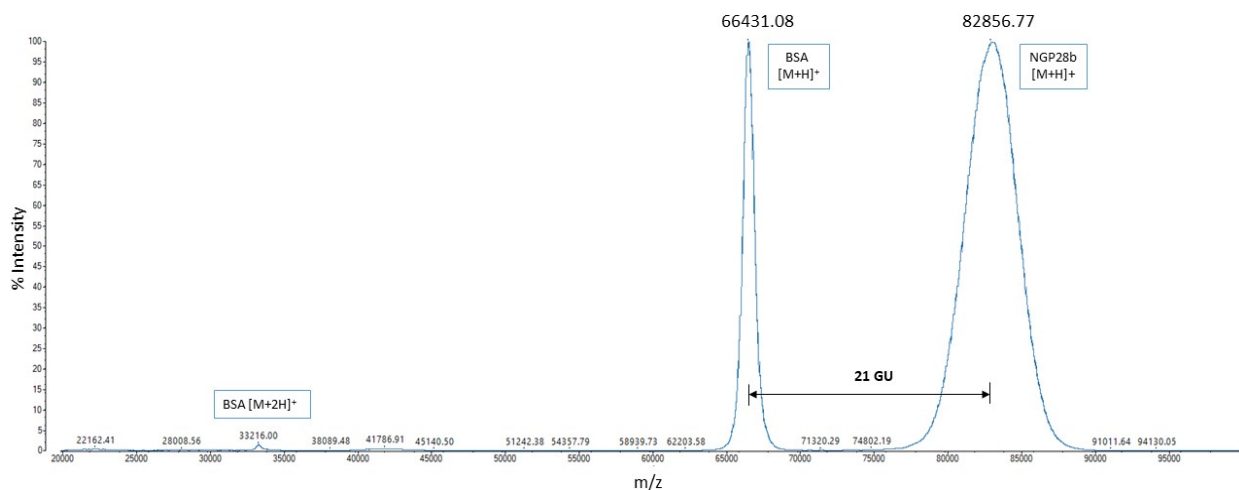

**Figure S1.** MALDI-TOF mass spectrum of **NGP28b** overlaid with the mass spectrum of pure BSA.  $m/z$ , mass-to-charge ratio.  $[\text{BSA} + \text{H}]^+ = 66,431 m/z$ ; for **NGP28b**  $[\text{M} + \text{H}]^+ = 82,856 m/z$ . The average glycan load of **G28** units (including the linkers) per BSA molecule was 21.

**Cross-titration ELISA for NGP28b, NGP31b, and 2ME-BSA varying antigen quantity [ng/well] and dilution of pooled sera**

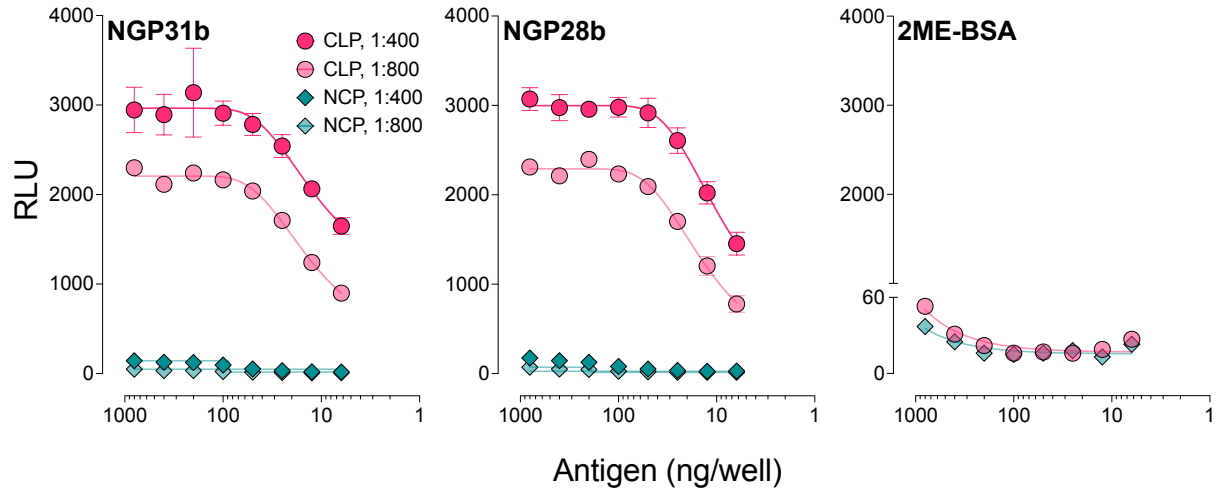

**Figure S2.** Initial antigen-serum cross-titration of **NGP31b**, **NGP28b**, and **2ME-BSA** measured by cELISA. Both NGPs and **2ME-BSA** (negative antigen control) were immobilized at 800, 400, 200, 100, 50, 25, 12.5, and 6.25 ng/well, and assayed in duplicate with pools of sera (n=10 each) from individuals with cutaneous leishmaniasis (CLP) or healthy negative controls (NCP) from endemic areas for CL and CD, at 1:400 and 1:800 dilutions. RLU, relative luminescence units.



# <sup>1</sup>H NMR spectrum of compound 4

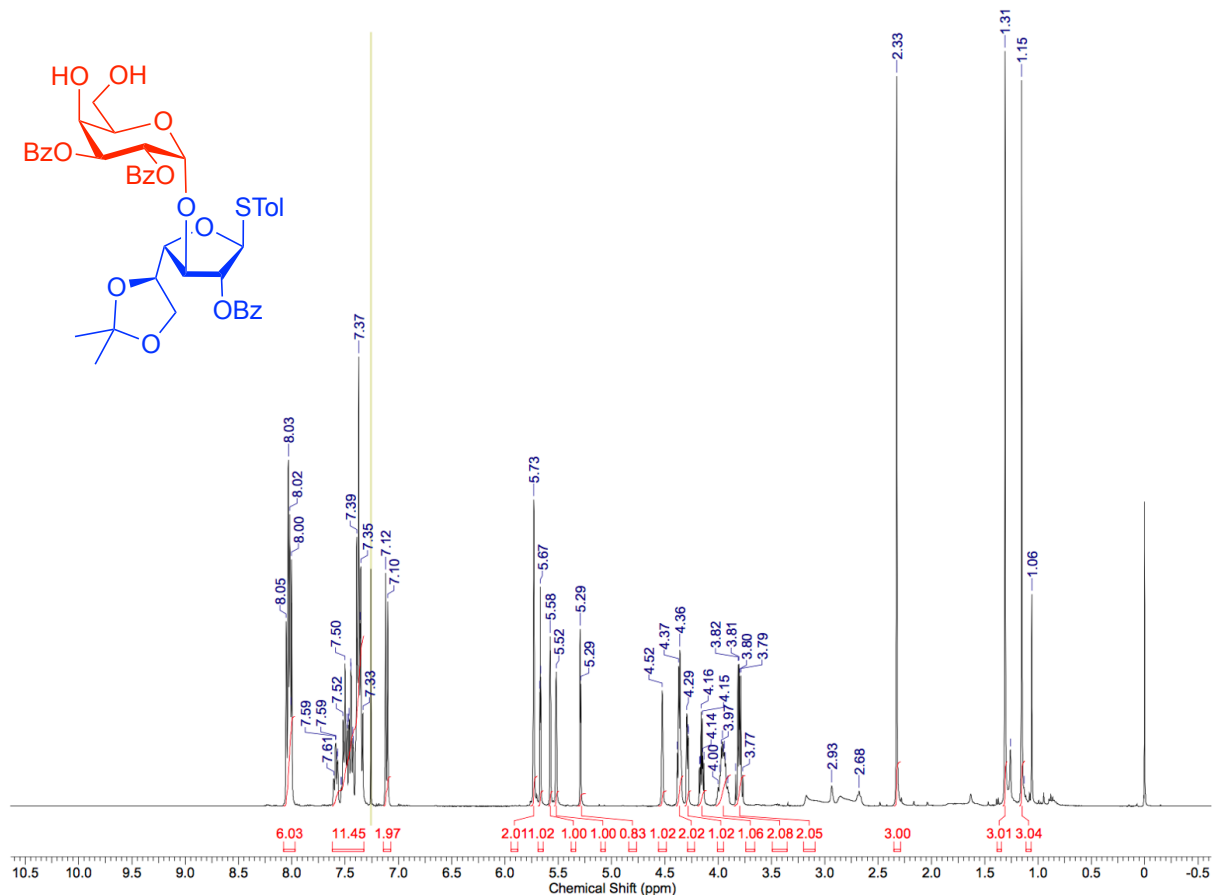

Figure S3. <sup>1</sup>H NMR spectrum of compound 4 in CDCl<sub>3</sub>, 400 MHz.

### $^{13}\text{C}$ NMR spectrum of compound 4

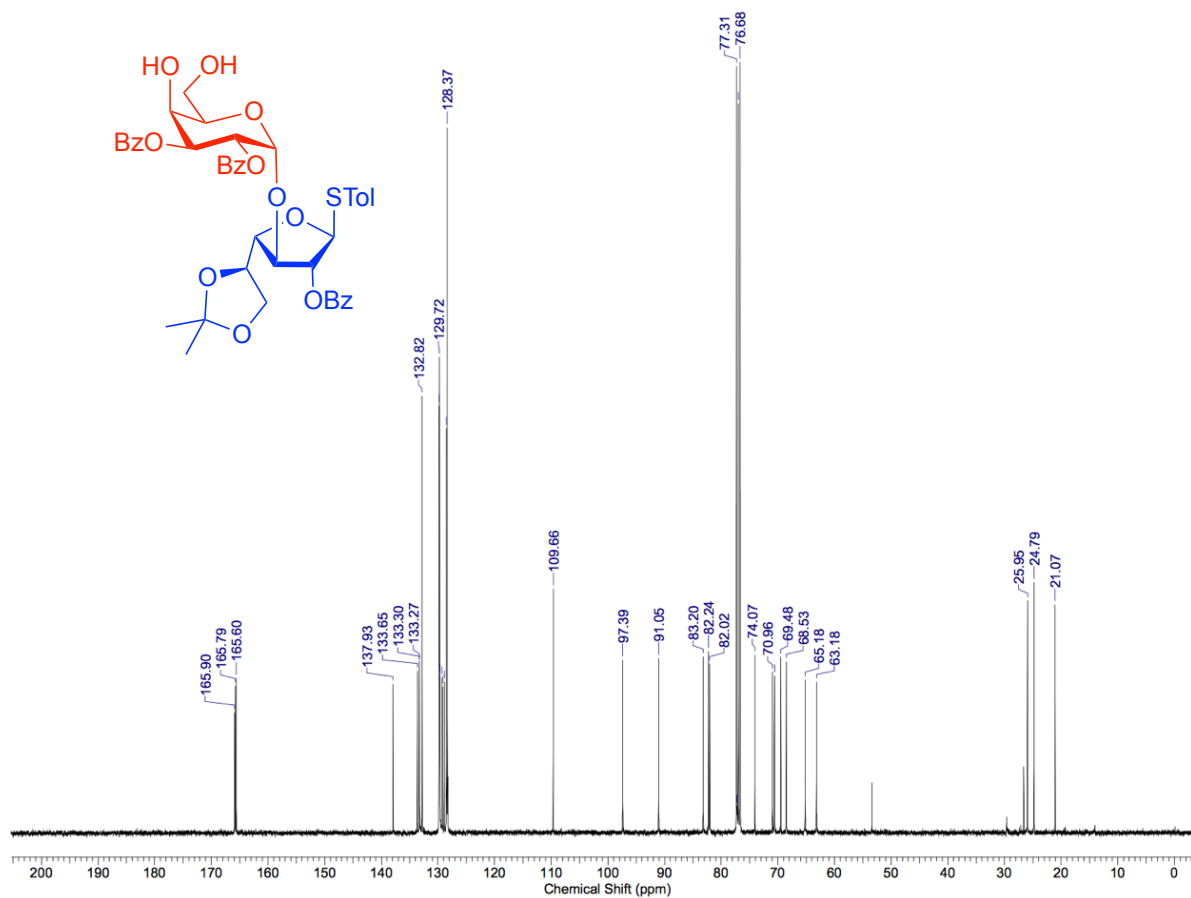

**Figure S4.**  $^{13}\text{C}$  NMR spectrum of compound 4 in  $\text{CDCl}_3$ , 100 MHz.

## Mass spectrum of compound 4

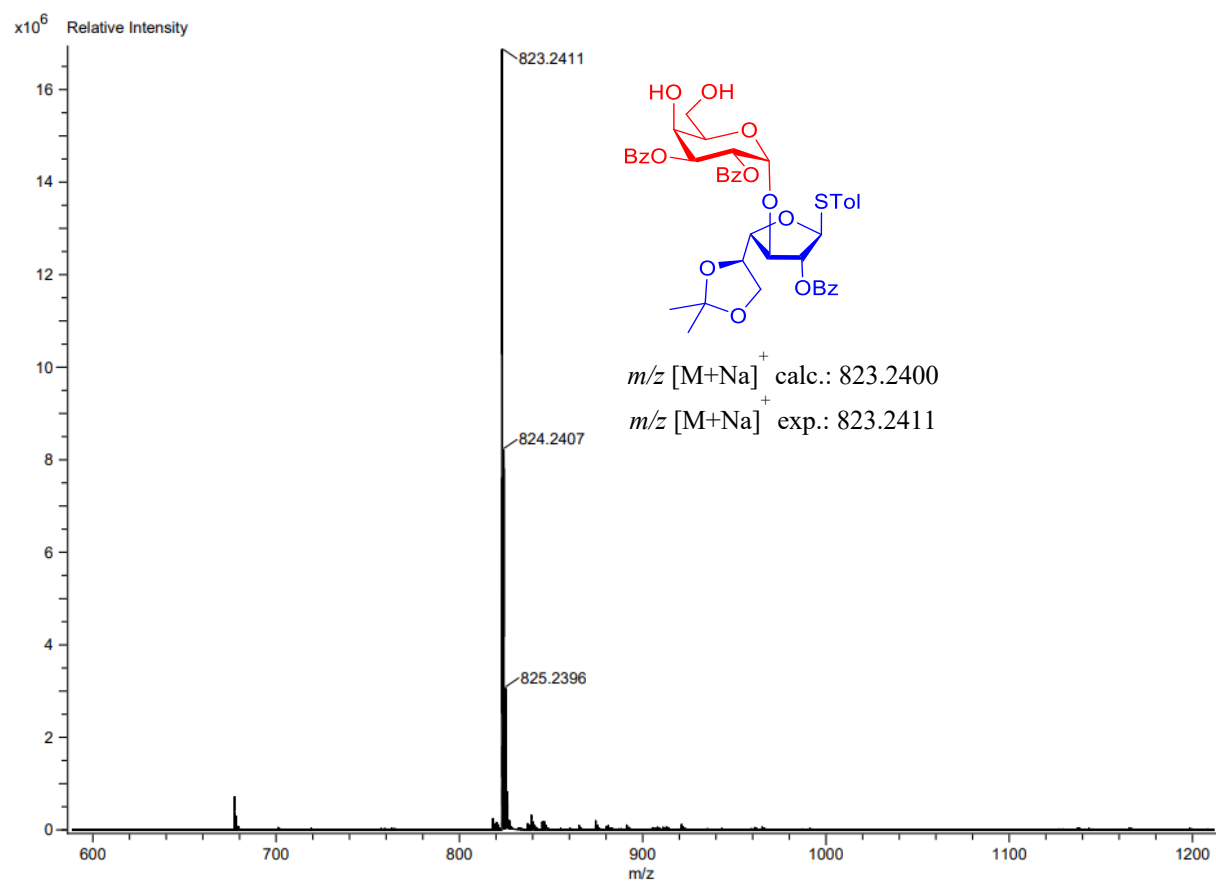

Figure S5. ESI-TOF HR MS of compound 4

# <sup>1</sup>H NMR spectrum of compound 5

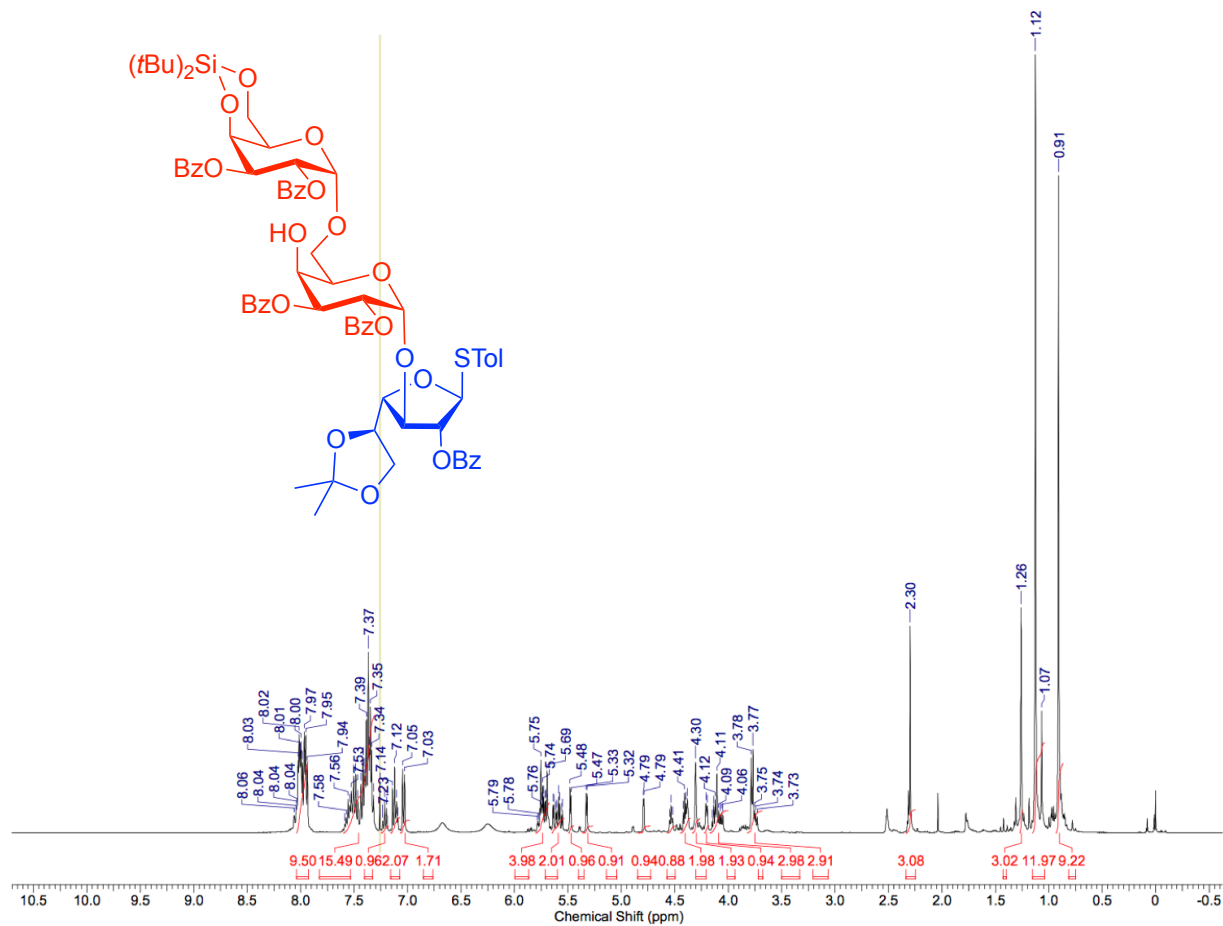

Figure S6. <sup>1</sup>H NMR spectrum of compound 5 in CDCl<sub>3</sub>, 400 MHz.

**$^{13}\text{C}$  NMR spectrum of compound 5**

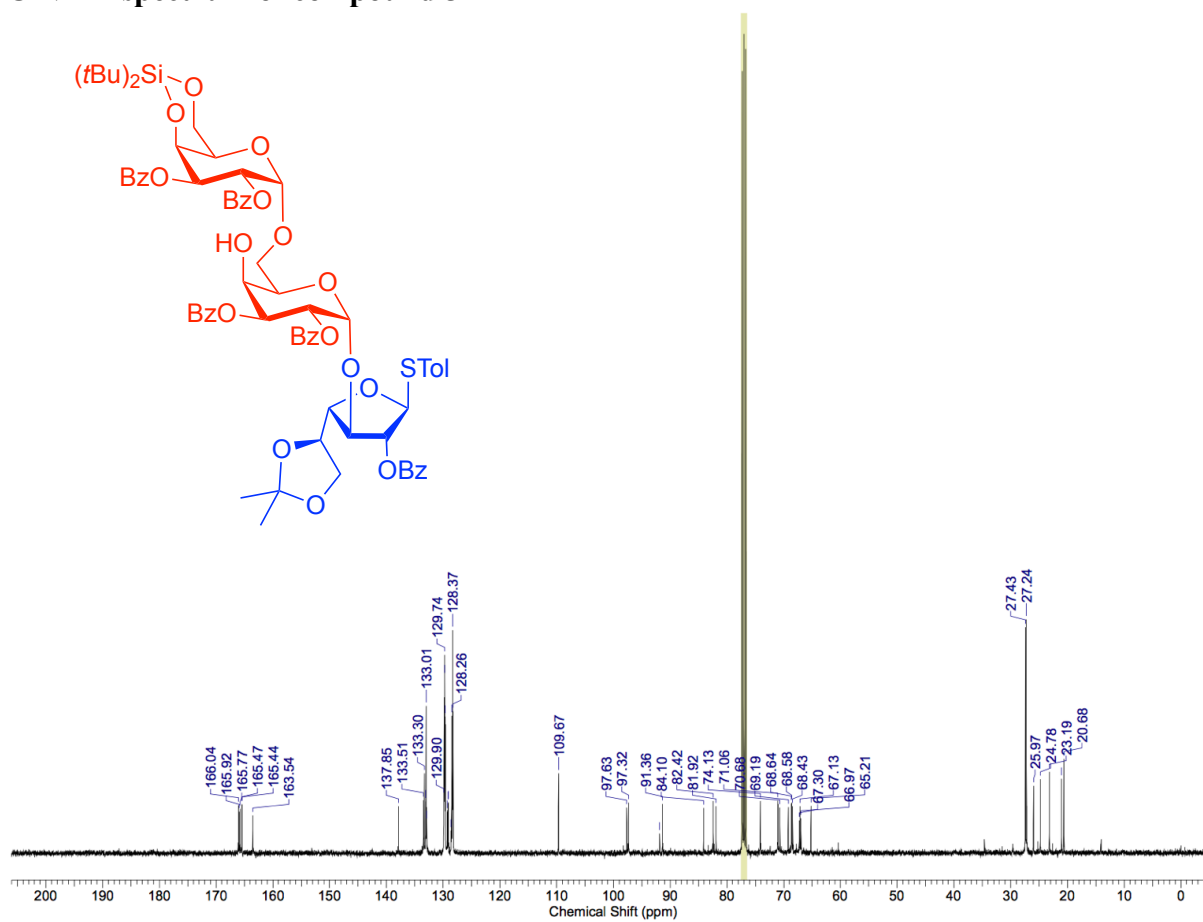

**Figure S7.**  $^{13}\text{C}$  NMR spectrum of compound 5 in  $\text{CDCl}_3$ , 100 MHz.

## Mass spectrum of compound 5

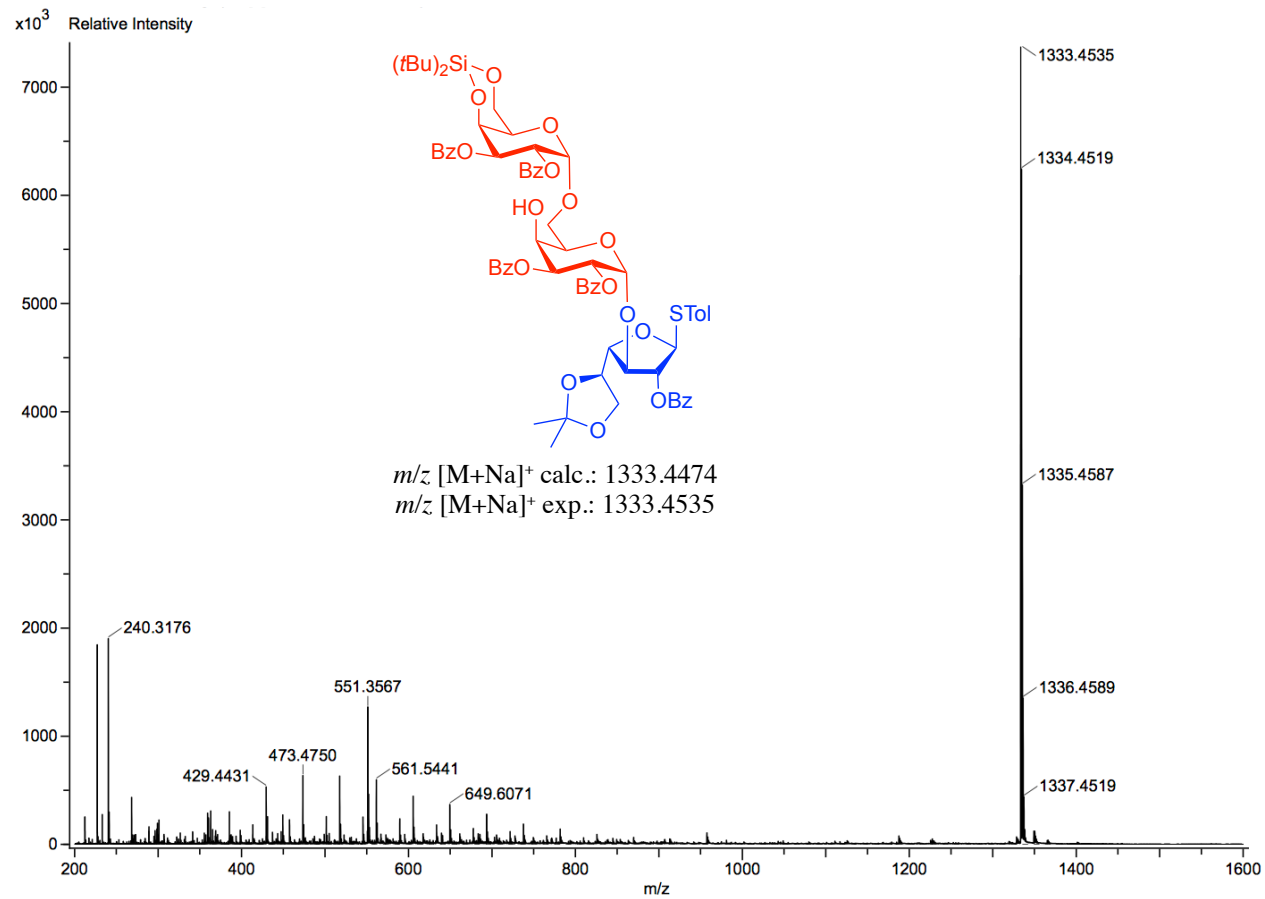

**Figure S8.** ESI-TOF HR MS of compound 5.

# <sup>1</sup>H NMR spectrum of compound 7

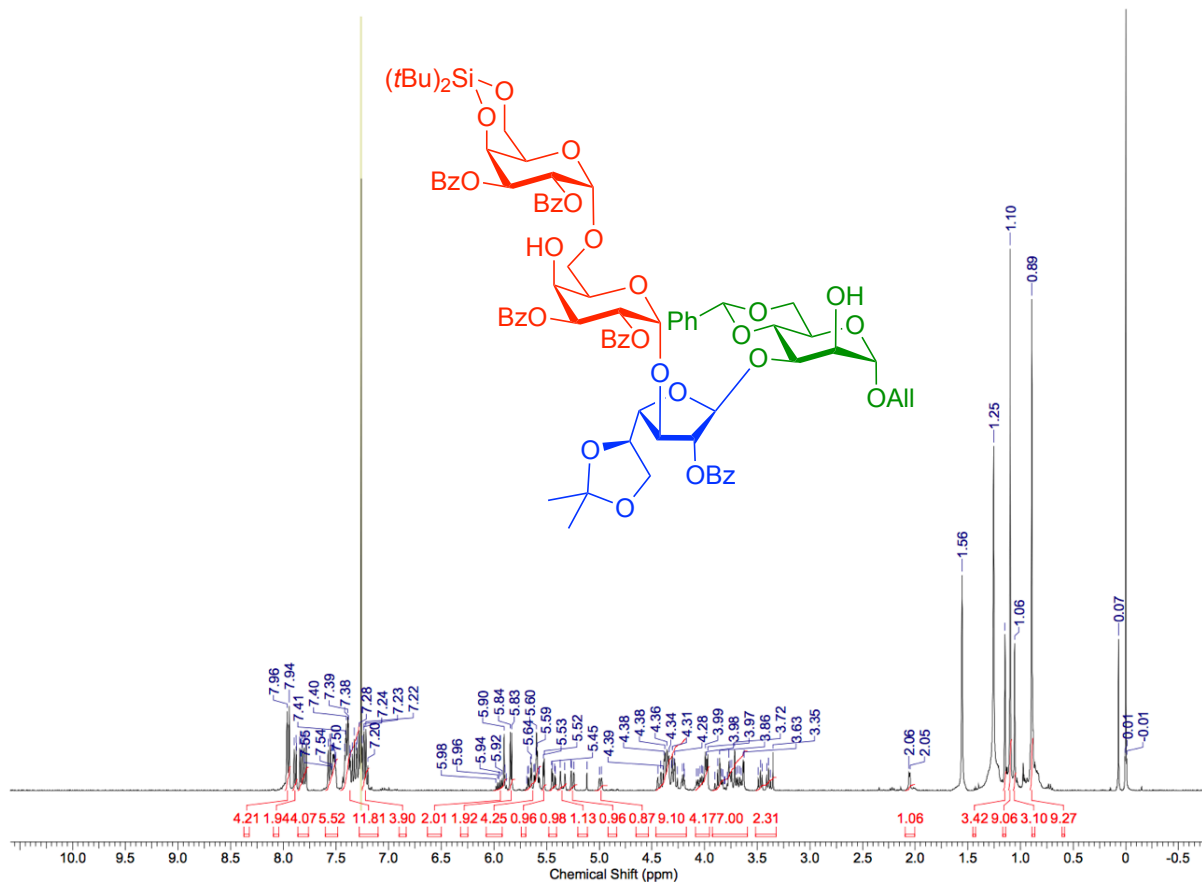

Figure S9. <sup>1</sup>H NMR spectrum of compound 7 in CDCl<sub>3</sub>, 400 MHz.

### $^{13}\text{C}$ NMR spectrum of compound 7

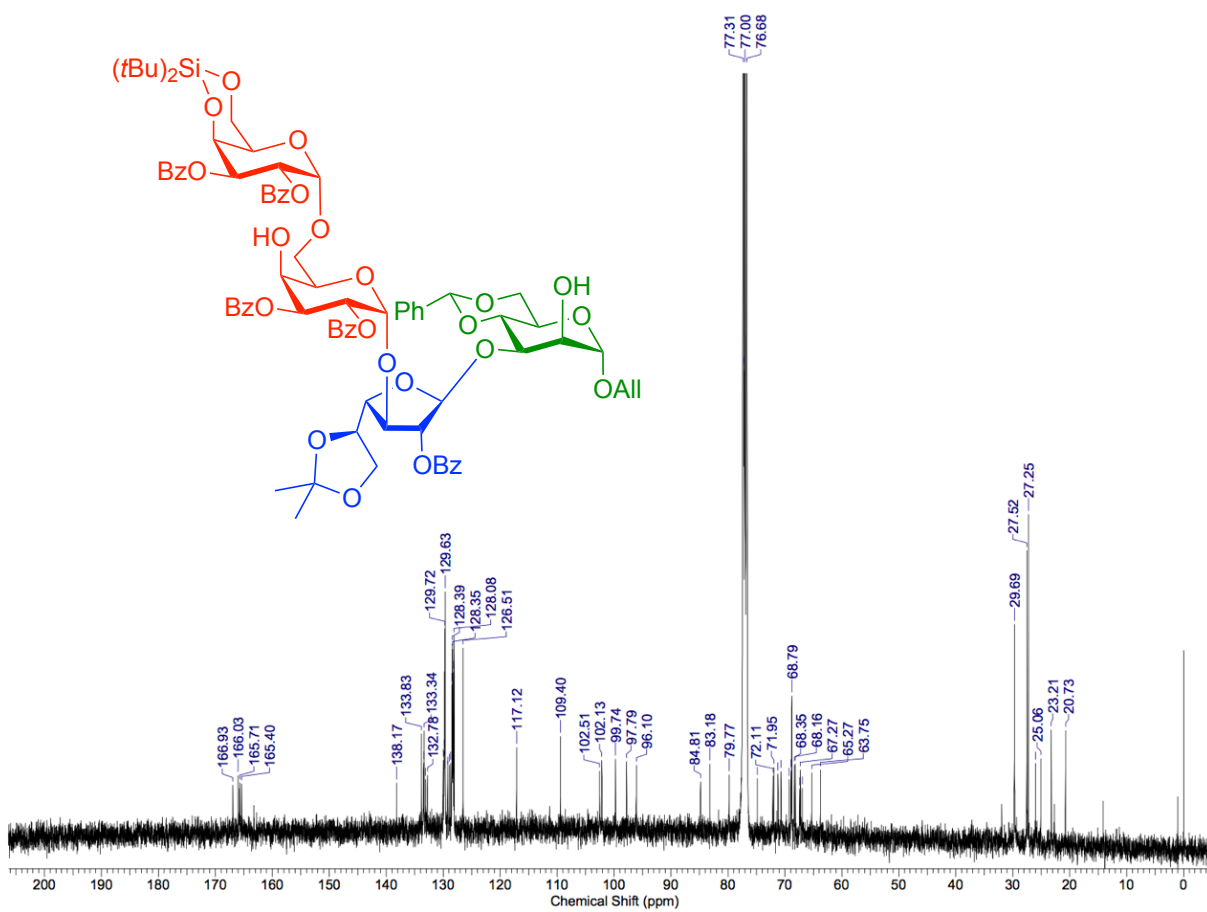

**Figure S10.**  $^{13}\text{C}$  NMR spectrum of compound 7 in  $\text{CDCl}_3$ , 100 MHz.



# Mass spectrum of compound 7

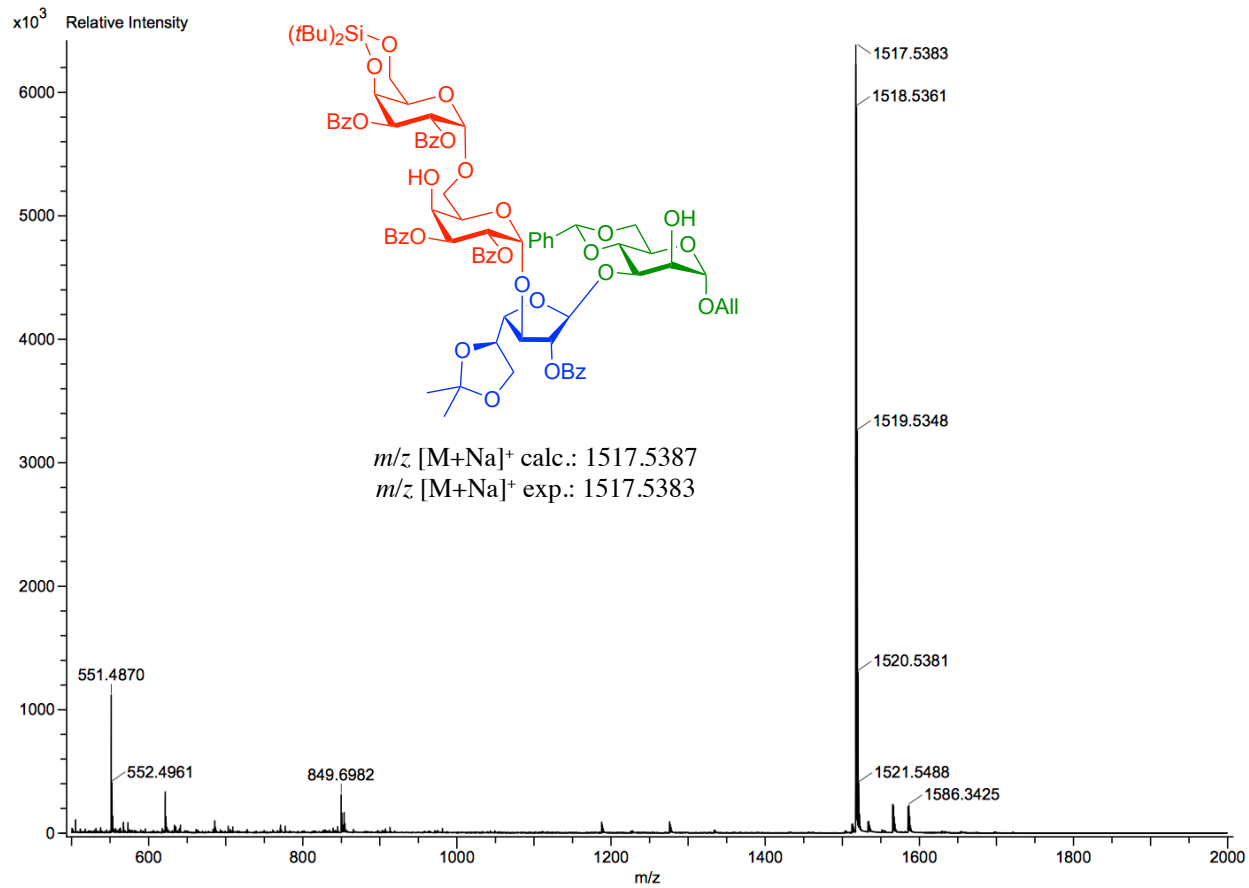

Figure S11. ESI-TOF HR MS of compound 7.

# $^1\text{H}$ NMR spectrum of compound **8**

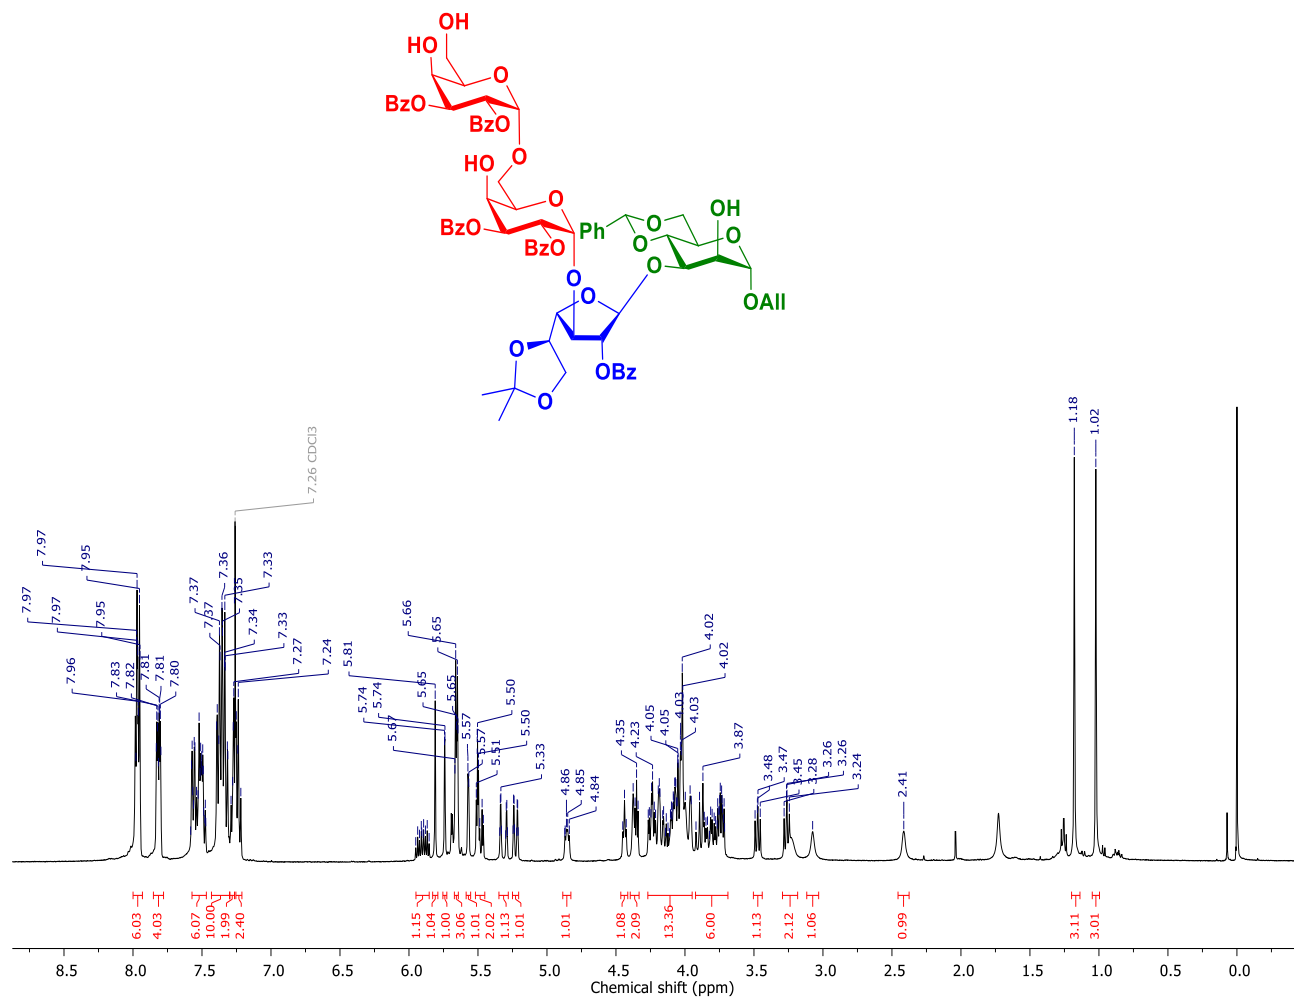

**Figure S12.**  $^1\text{H}$  NMR spectrum of compound **8** in  $\text{CDCl}_3$ , 400 MHz.

$^{13}\text{C}$  NMR spectrum of compound **8**

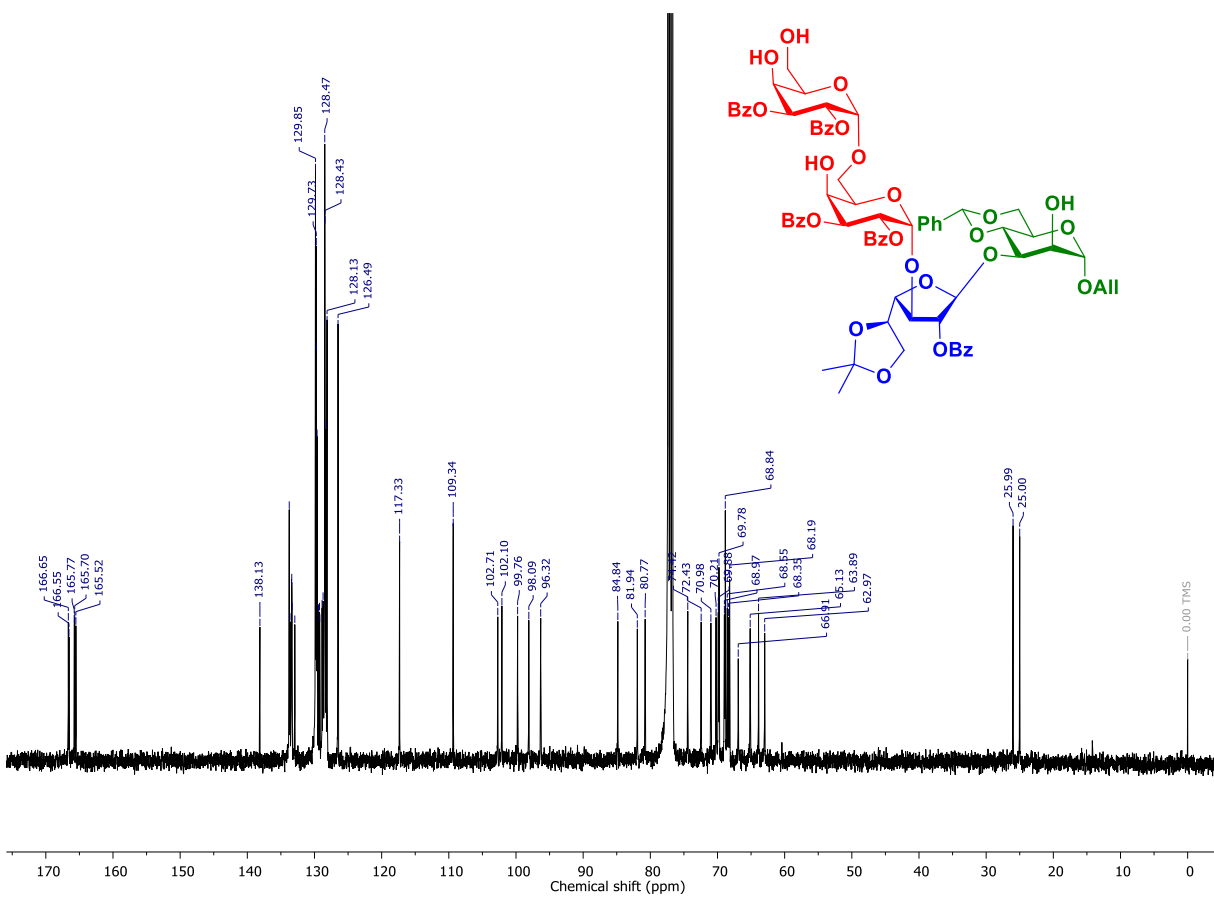

**Figure S13.**  $^{13}\text{C}$  NMR spectrum of compound **8** in  $\text{CDCl}_3$ , 100 MHz.

## COSY NMR spectrum of compound **8**

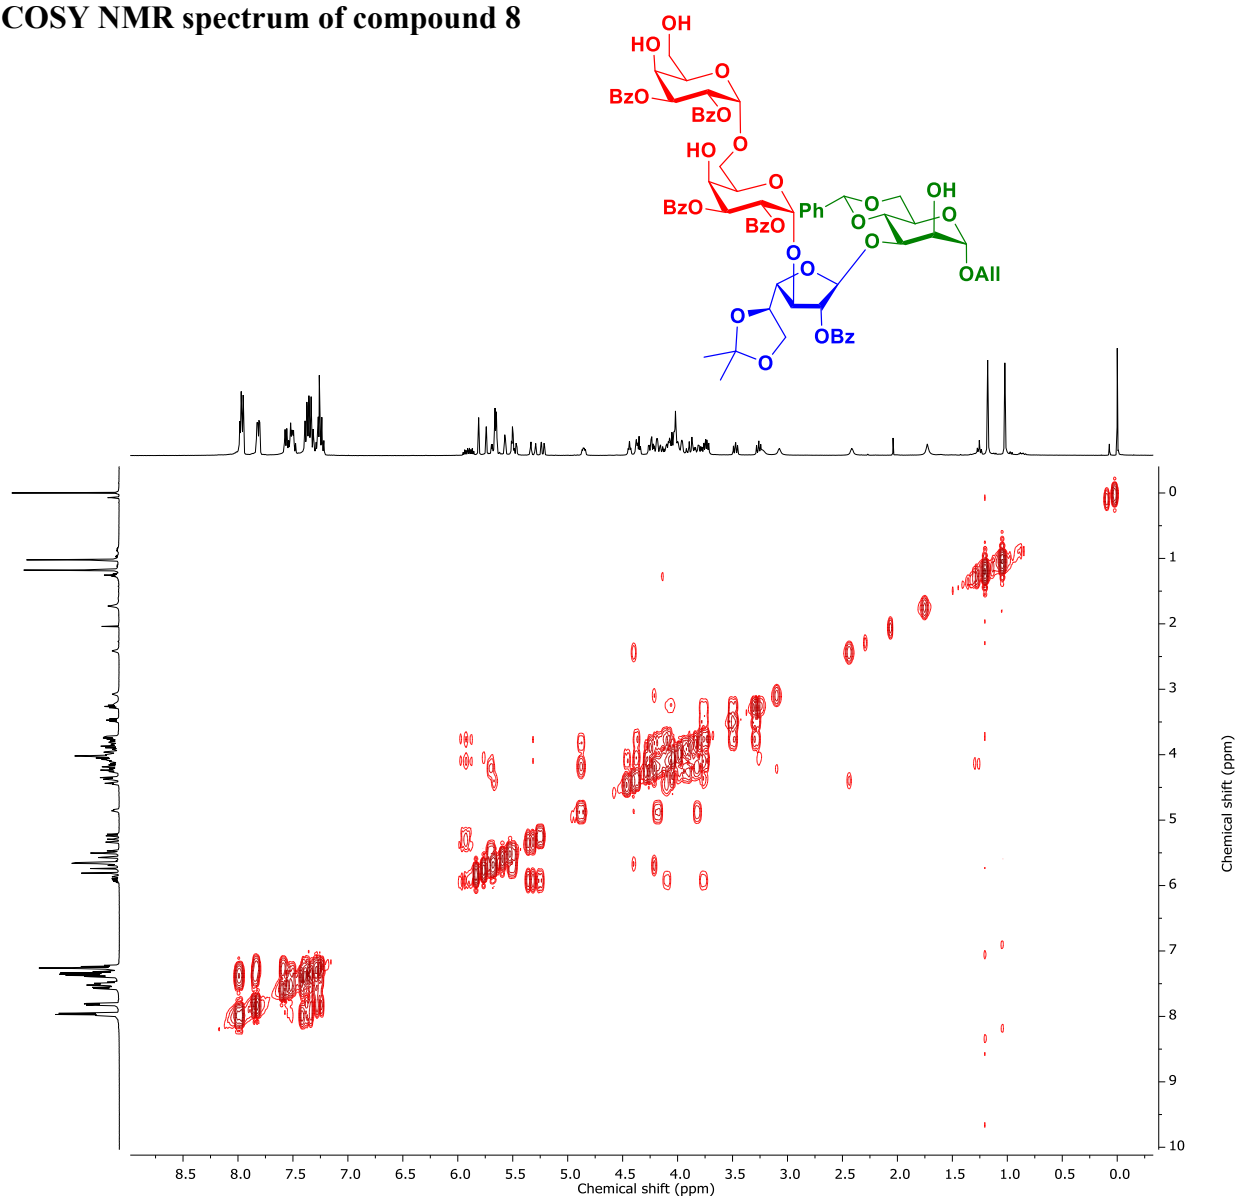

**Figure S14.** COSY NMR spectrum of compound **8** in CDCl<sub>3</sub>, 400 MHz.

### HSQC NMR spectrum of compound **8**

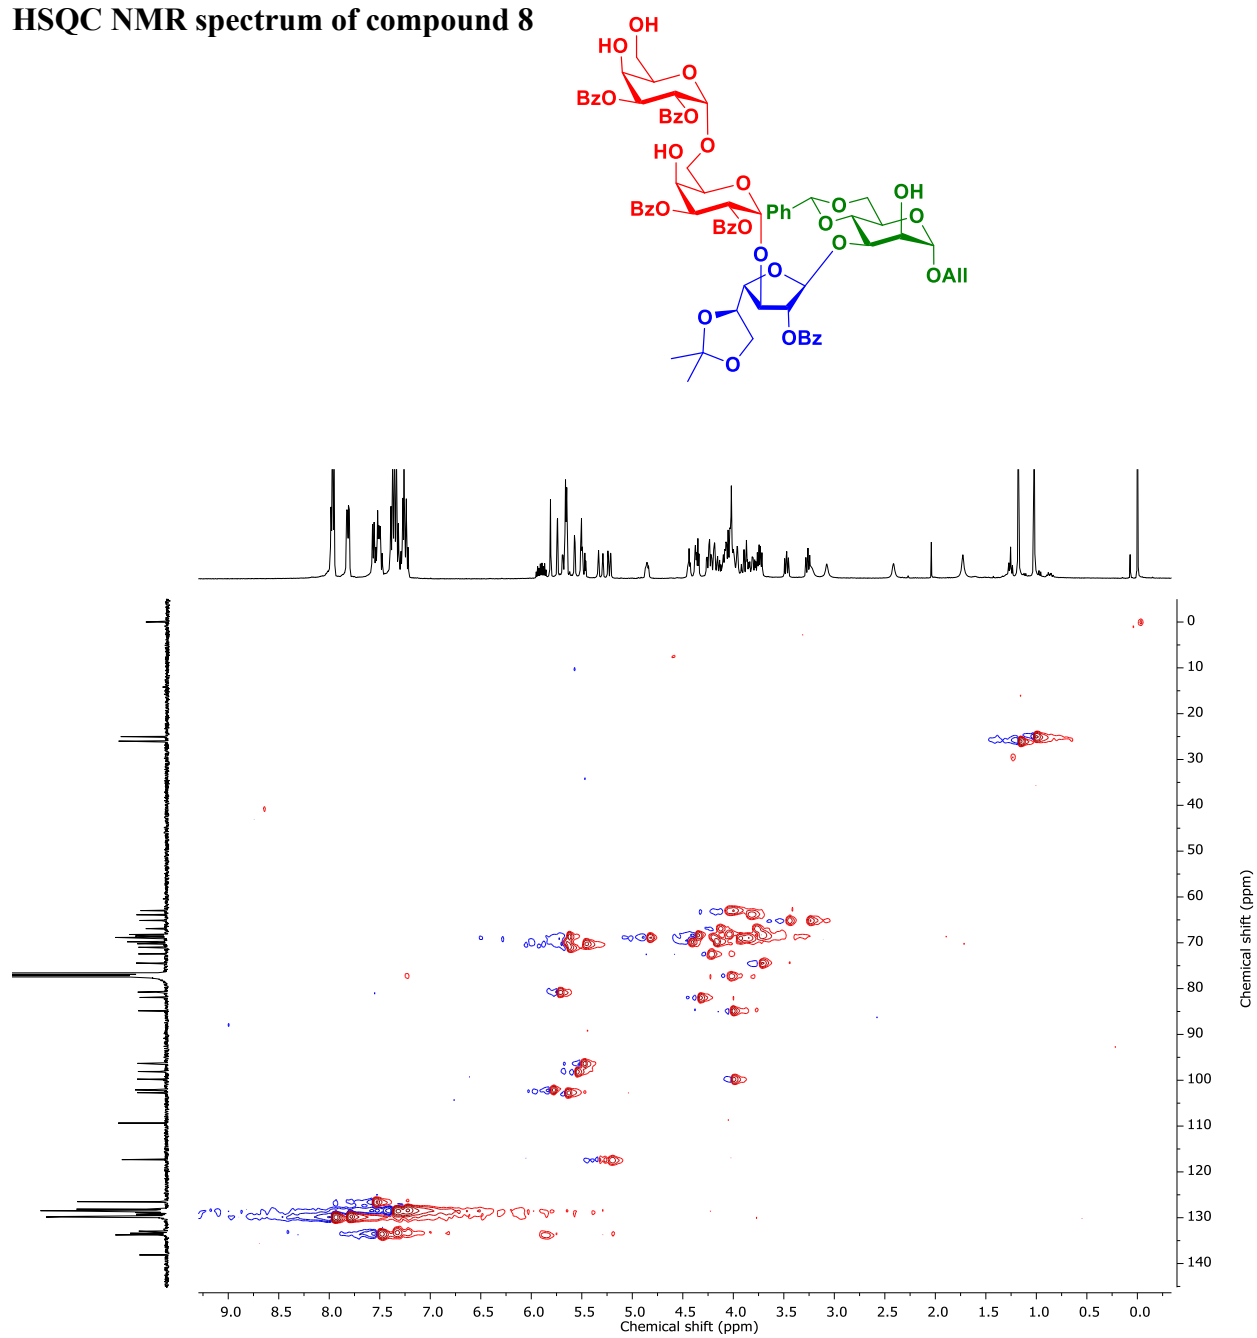

**Figure S15.** HSQC NMR spectrum of compound **8** in CDCl<sub>3</sub>.

## Mass spectrum of compound 8

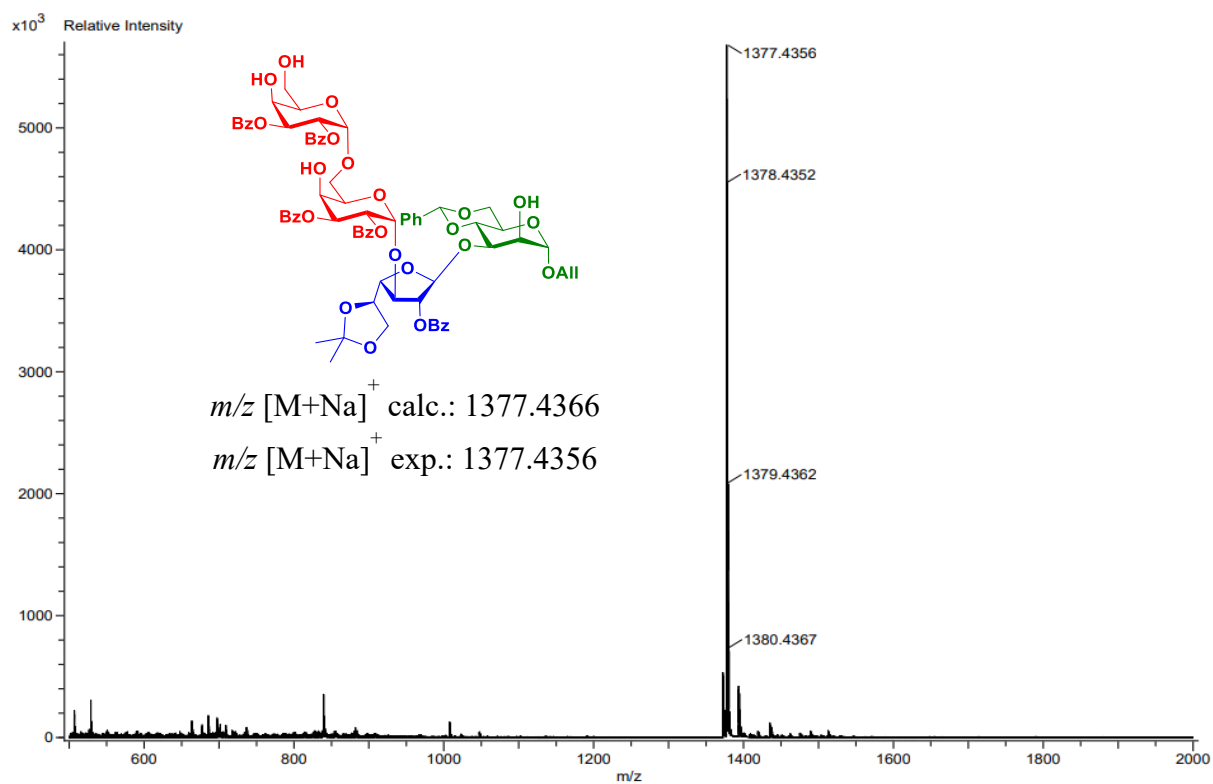

**Figure S16.** ESI-TOF HR MS of compound 8.

# <sup>1</sup>H NMR spectrum of compound 9

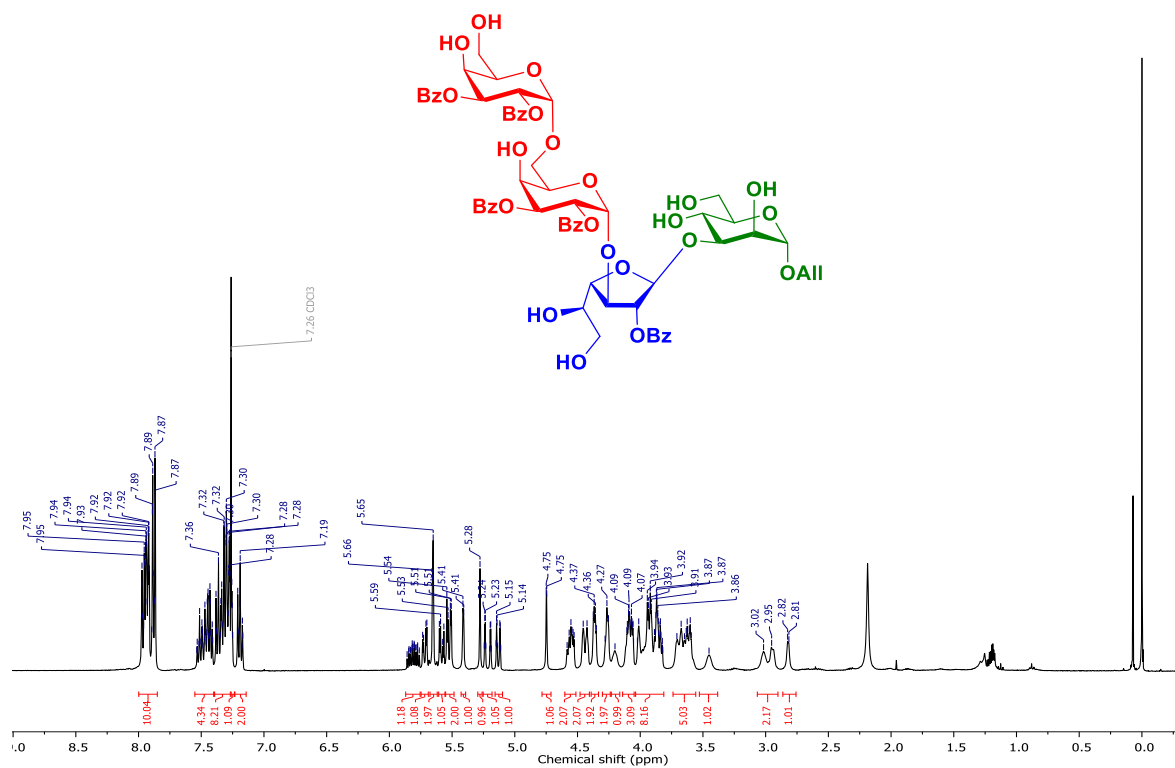

Figure S17. <sup>1</sup>H NMR spectrum of compound 9 in CDCl<sub>3</sub>, 400 MHz.

# $^{13}\text{C}$ NMR spectrum of compound **9**

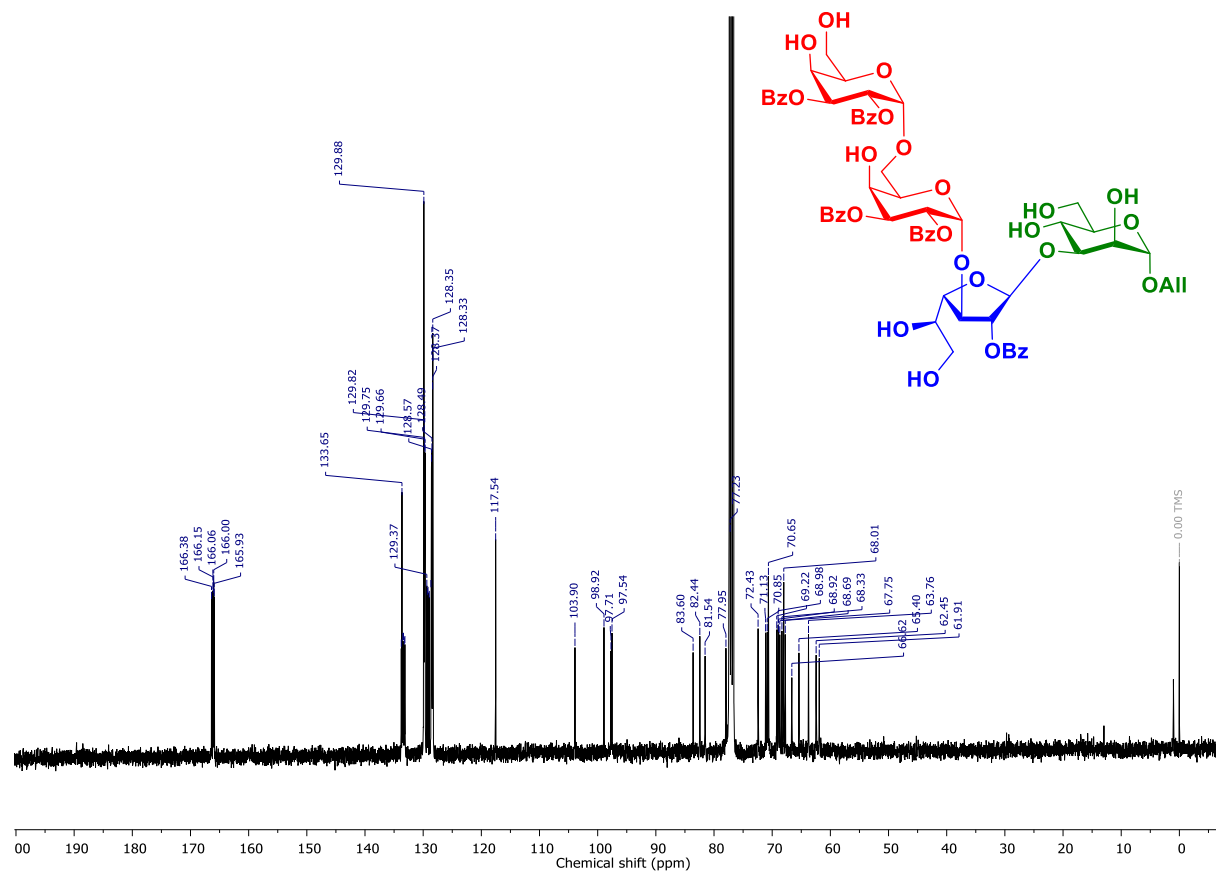

**Figure S18.**  $^{13}\text{C}$  NMR spectrum of compound **9** in  $\text{CDCl}_3$ , 100 MHz.



## HSQC NMR spectrum of compound 9

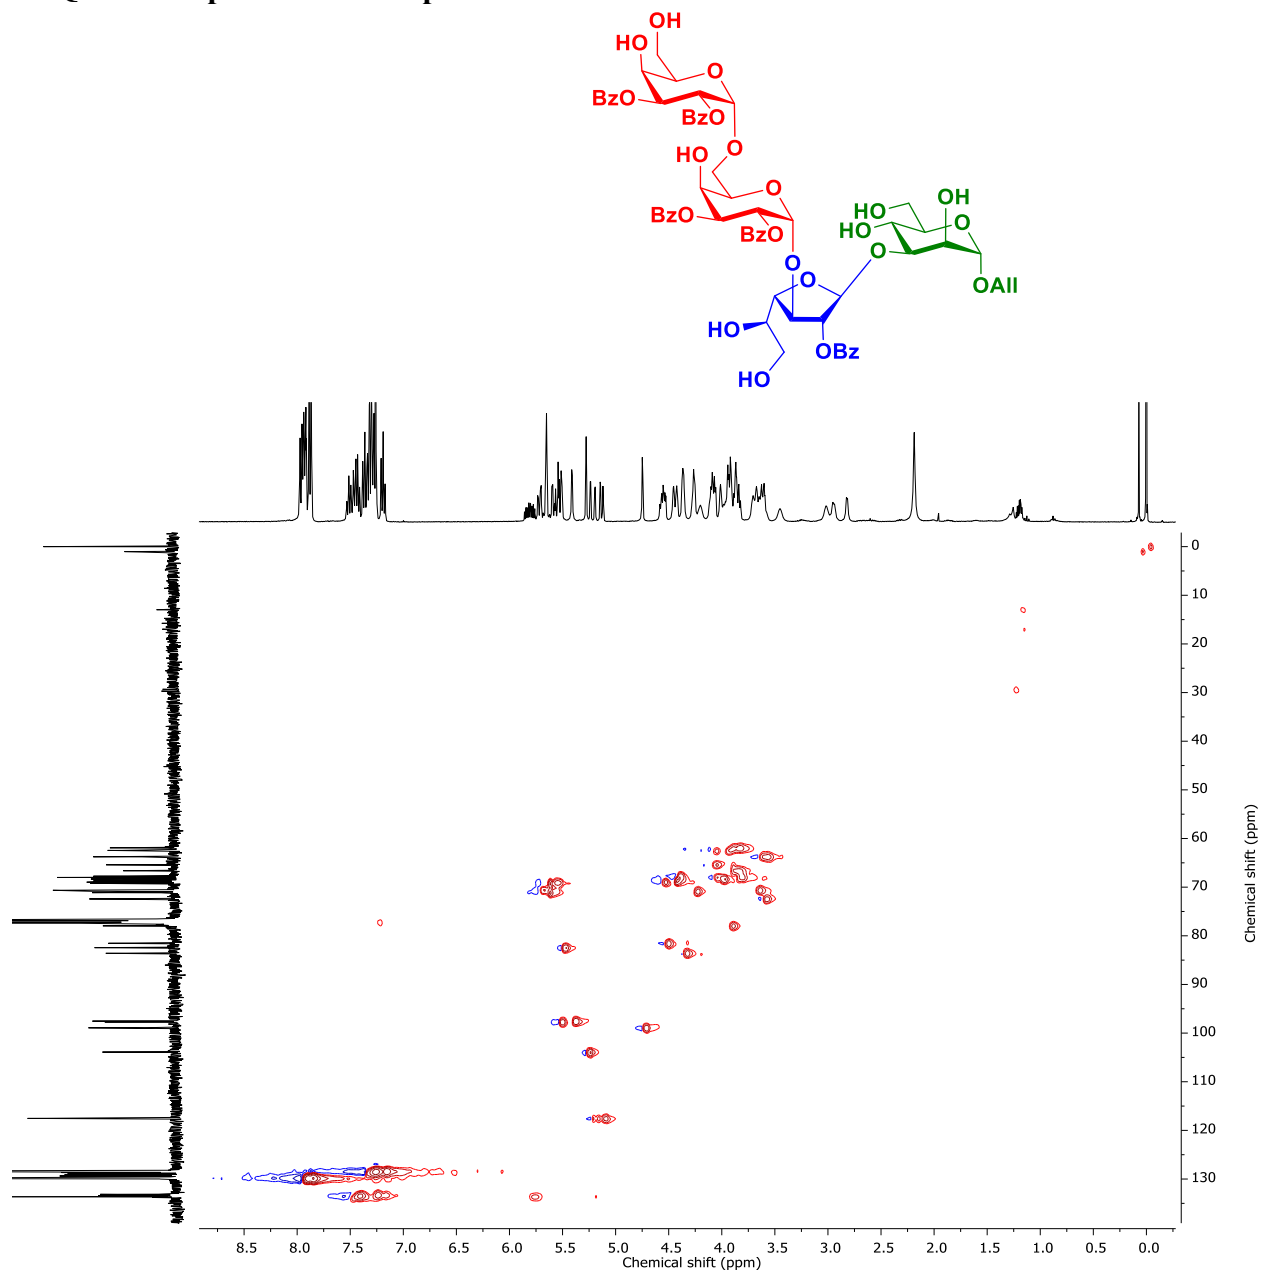

Figure S19. HSQC NMR spectrum of compound 9 in CDCl<sub>3</sub>.

## Mass spectrum of compound 9

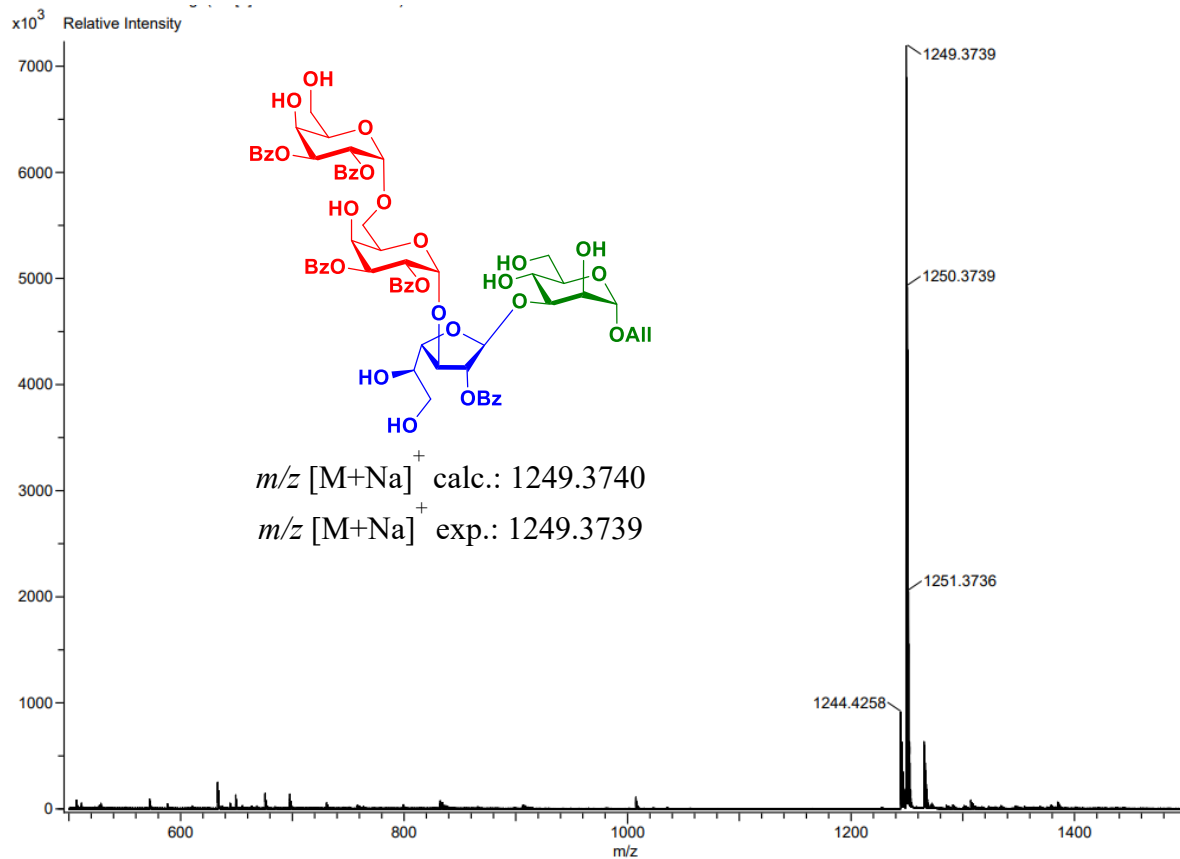

Figure S20. ESI-TOF HR MS of compound 9

# <sup>1</sup>H NMR spectrum of compound 10

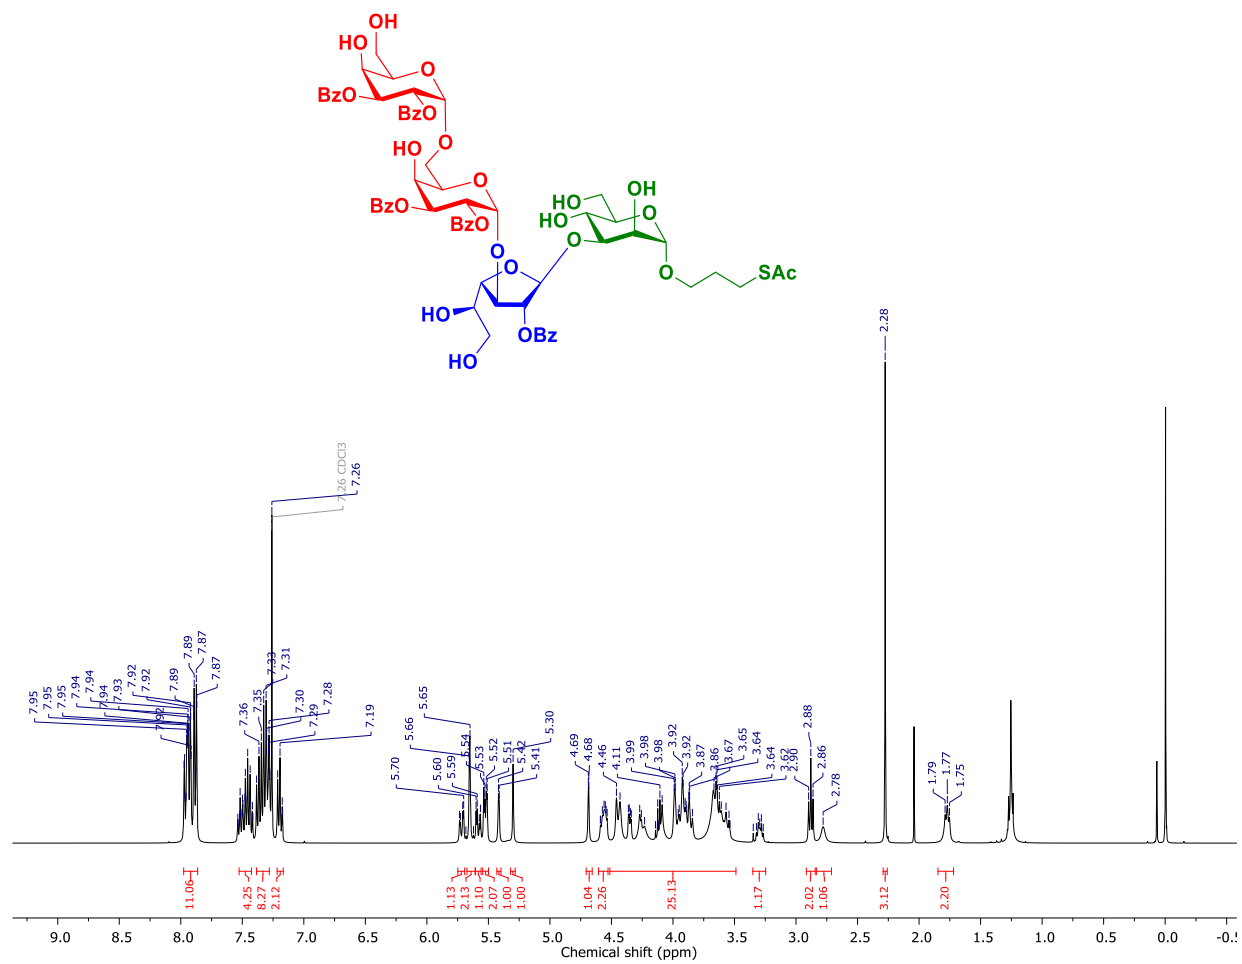

Figure S21. <sup>1</sup>H NMR spectrum of compound 10 in CDCl<sub>3</sub>, 400 MHz.

# $^{13}\text{C}$ NMR spectrum of compound 10

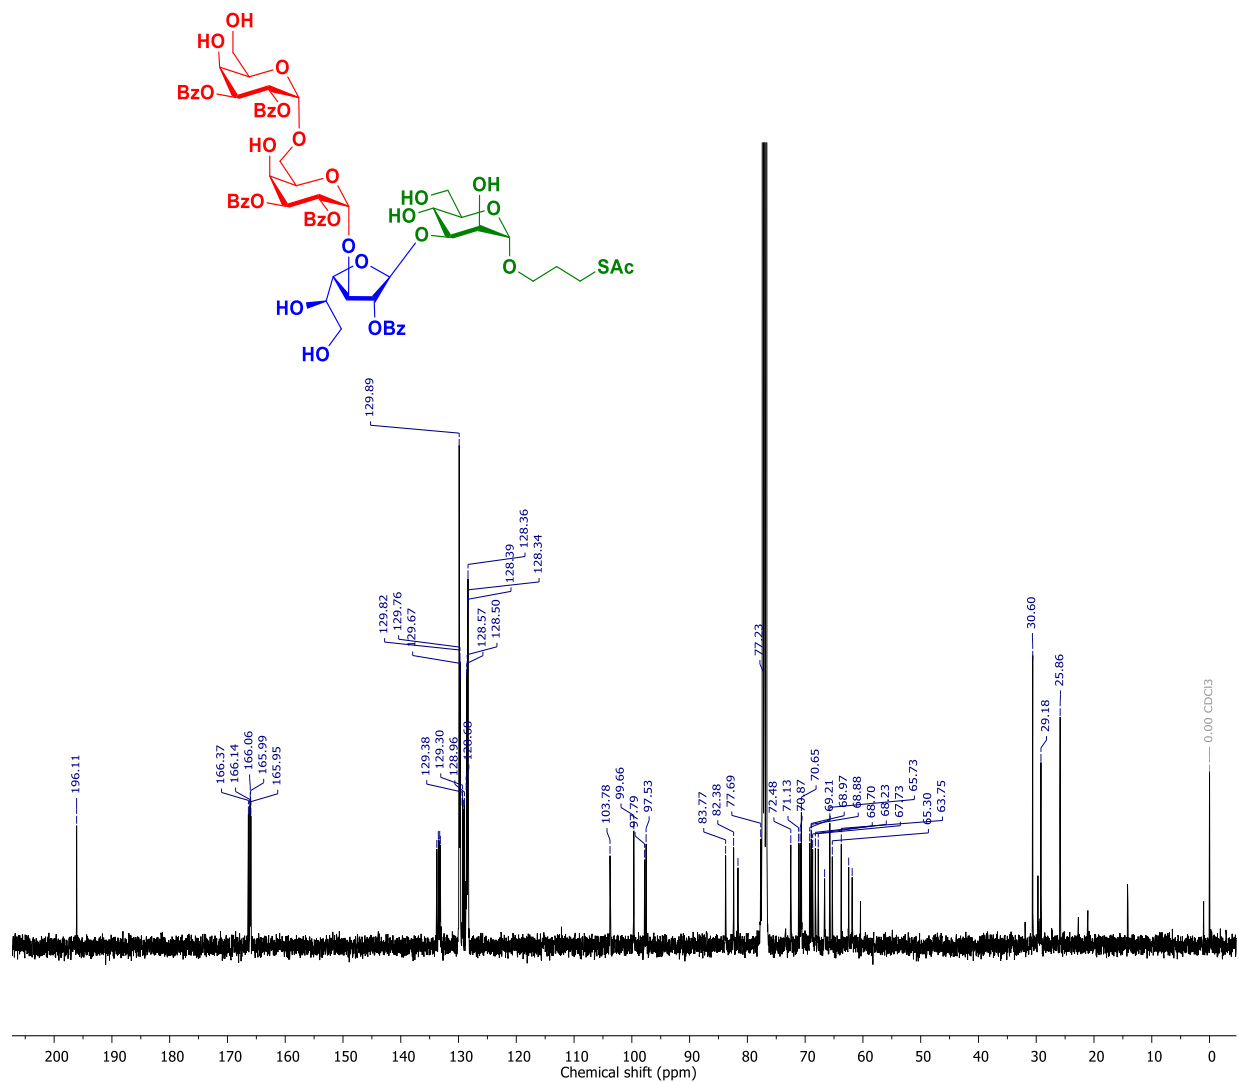

Figure S22.  $^{13}\text{C}$  NMR spectrum of compound 10 in  $\text{CDCl}_3$ , 100 MHz.

# HSQC NMR spectrum of compound 10

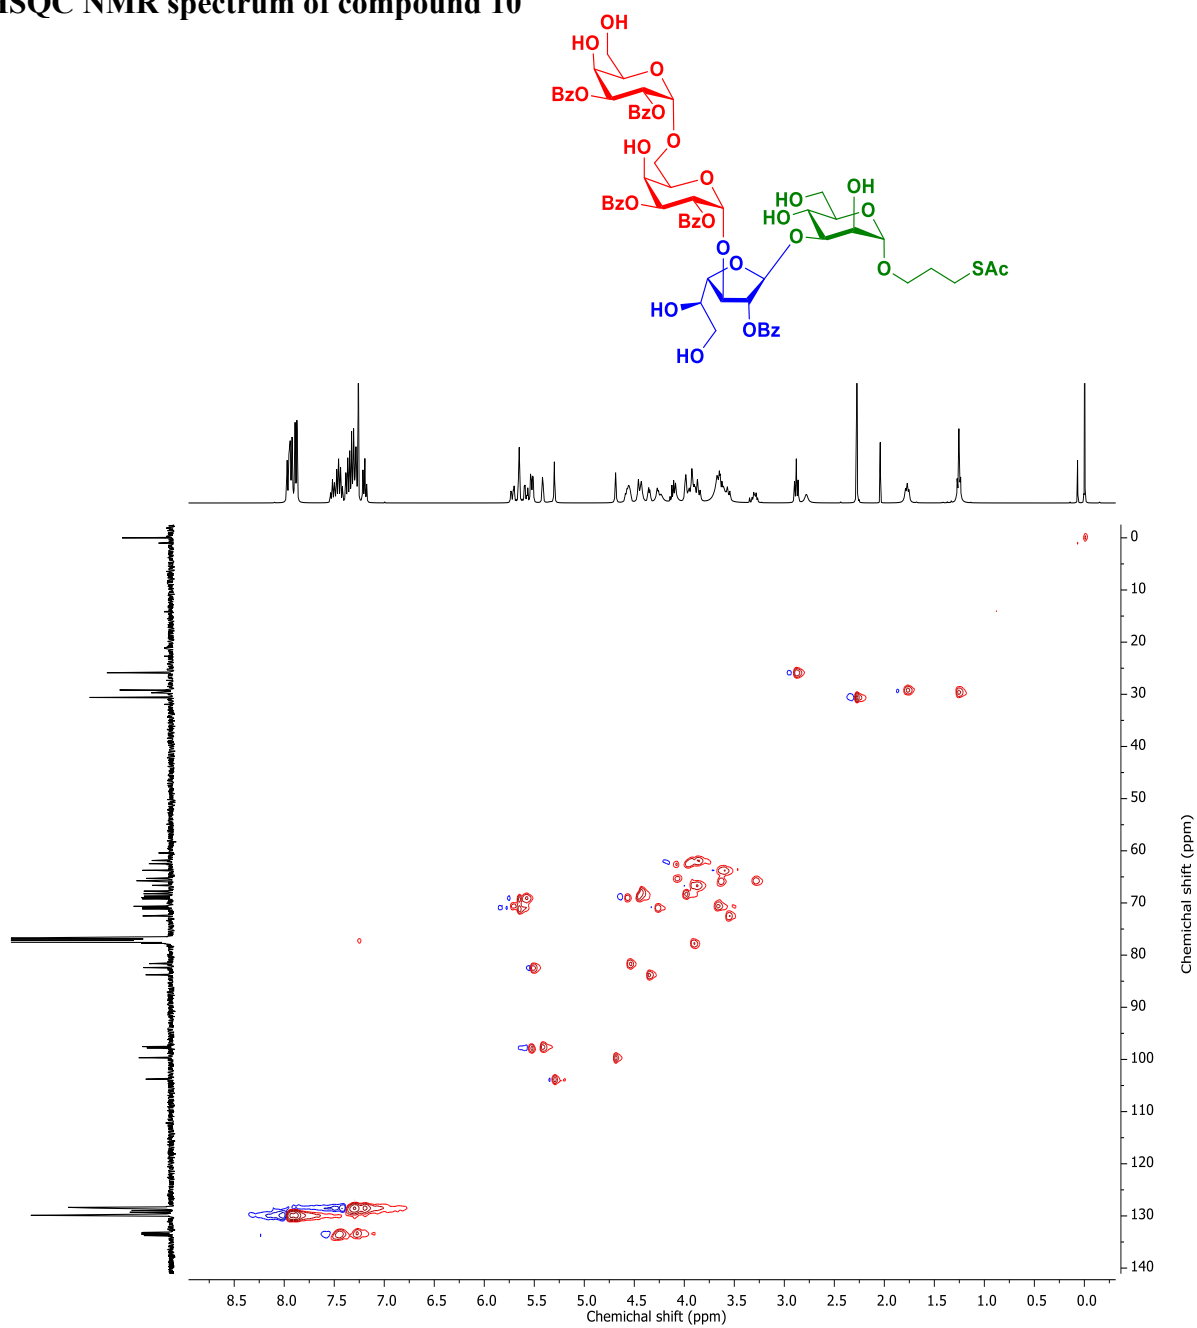

Figure S23. HSQC NMR spectrum of compound 10 in CDCl<sub>3</sub>.

## Mass spectrum of compound 10

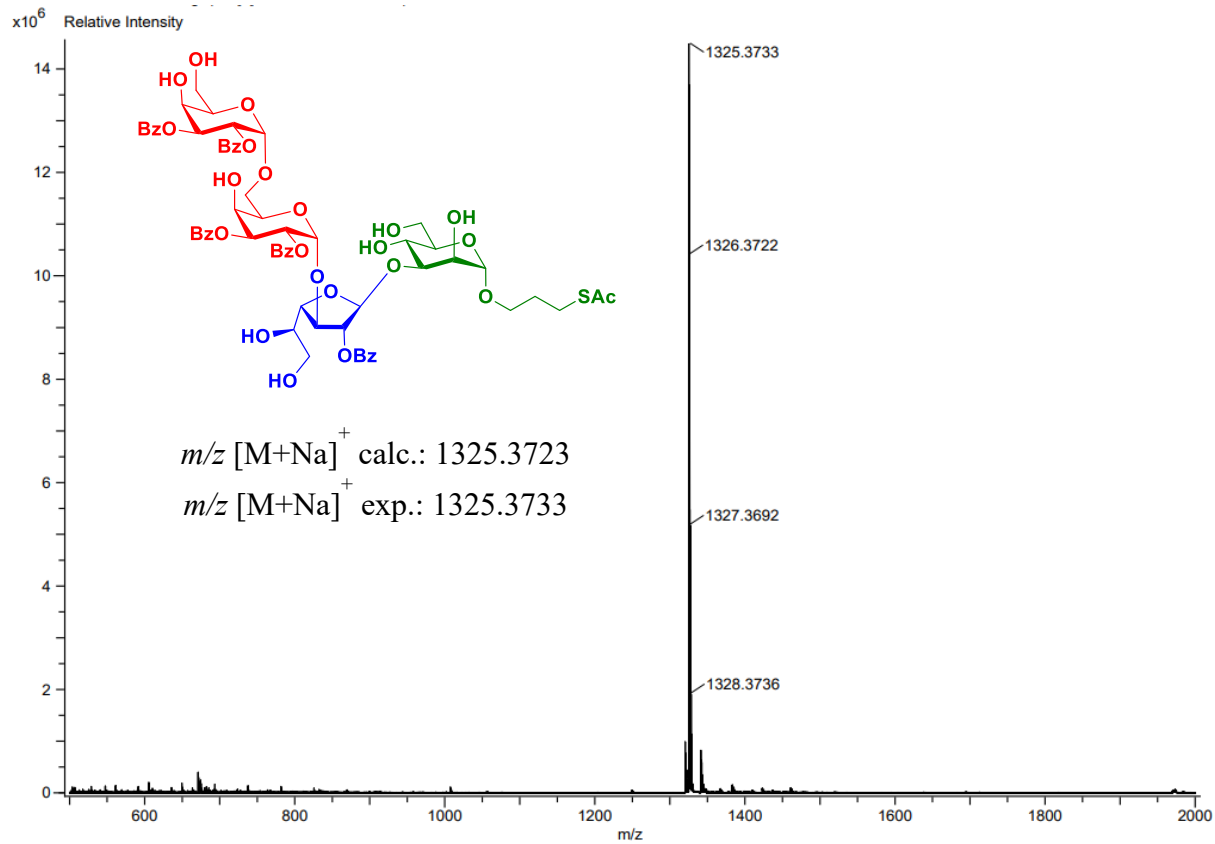

Figure S24. ESI-TOF HR MS of compound 10

# $^1\text{H}$ NMR spectrum of compound $\text{G31}_{\text{SH}}$

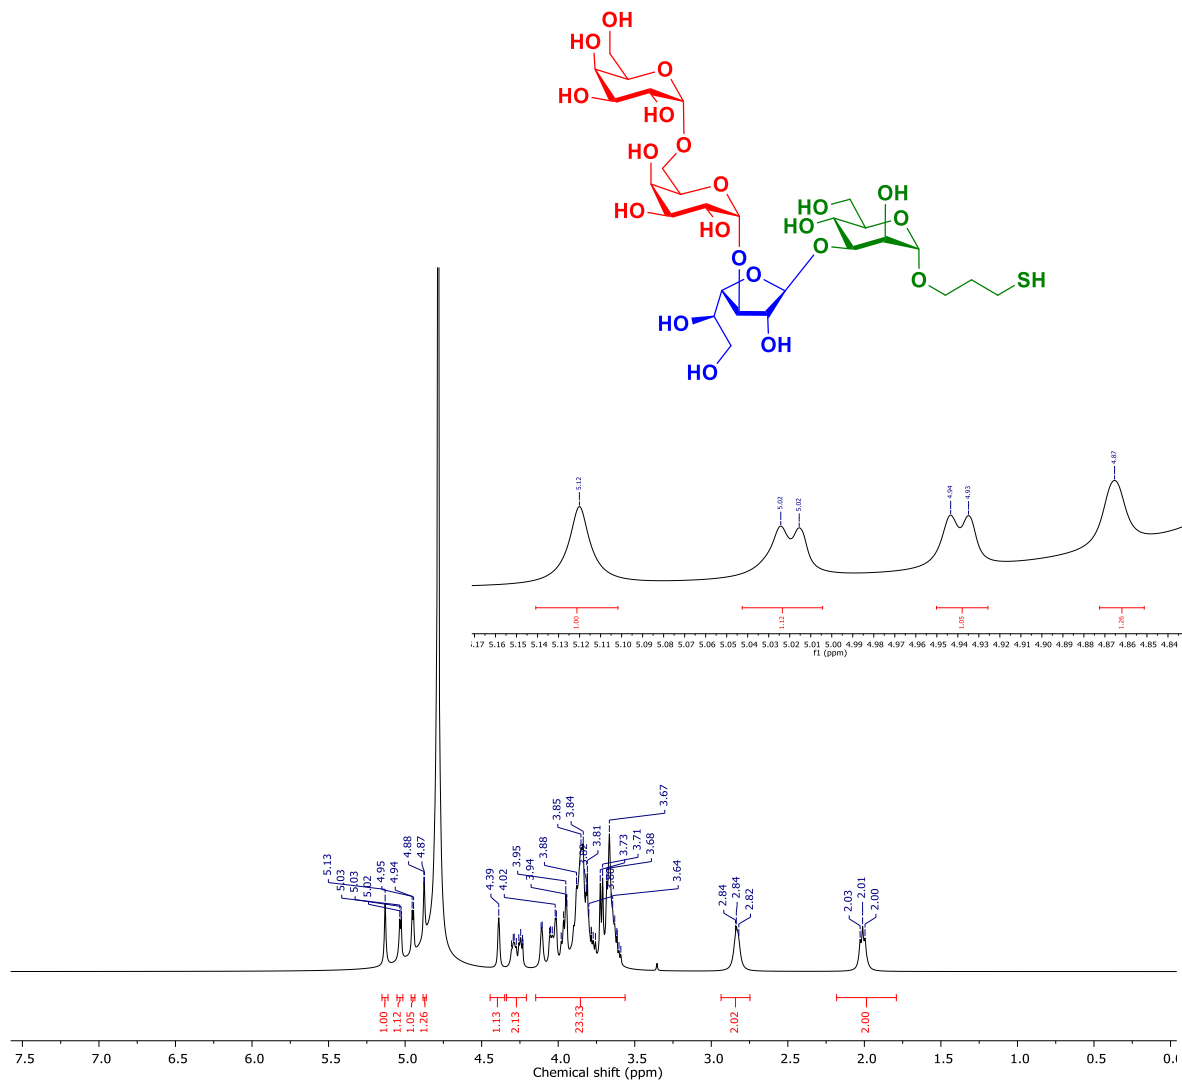

**Figure S25.**  $^1\text{H}$  NMR spectrum of compound  $\text{G31}_{\text{SH}}$  in  $\text{D}_2\text{O}$ , 400 MHz. The insert shows the region of the anomeric protons. The disulfide form  $(\text{G31}_{\text{S}})_2$  is likely to be present as well.

# $^{13}\text{C}$ NMR spectrum of compound $\text{G31}_{\text{SH}}$

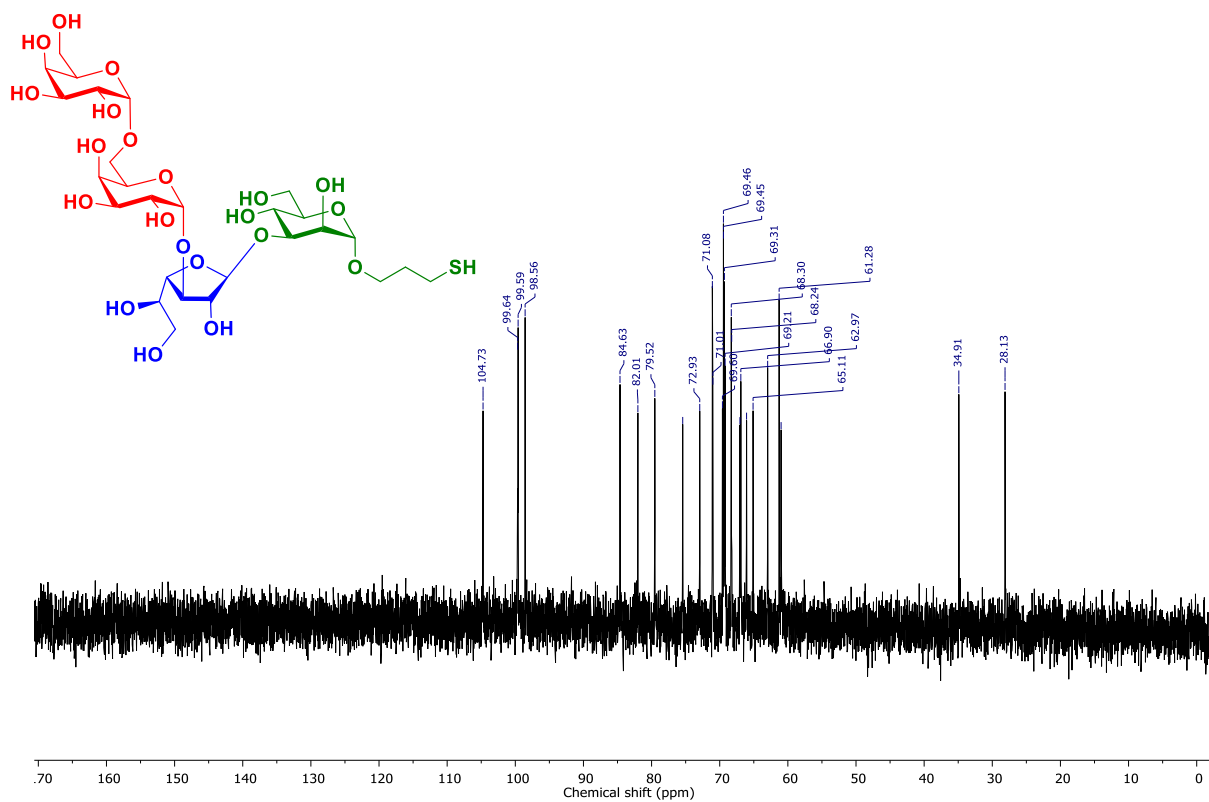

**Figure S26.**  $^{13}\text{C}$  NMR spectrum of compound  $\text{G31}_{\text{SH}}$  in  $\text{D}_2\text{O}$ , 100 MHz. The disulfide form  $(\text{G31}_{\text{S}})_2$  is likely to be present as well.



## HSQC NMR spectrum of G31<sub>SH</sub>

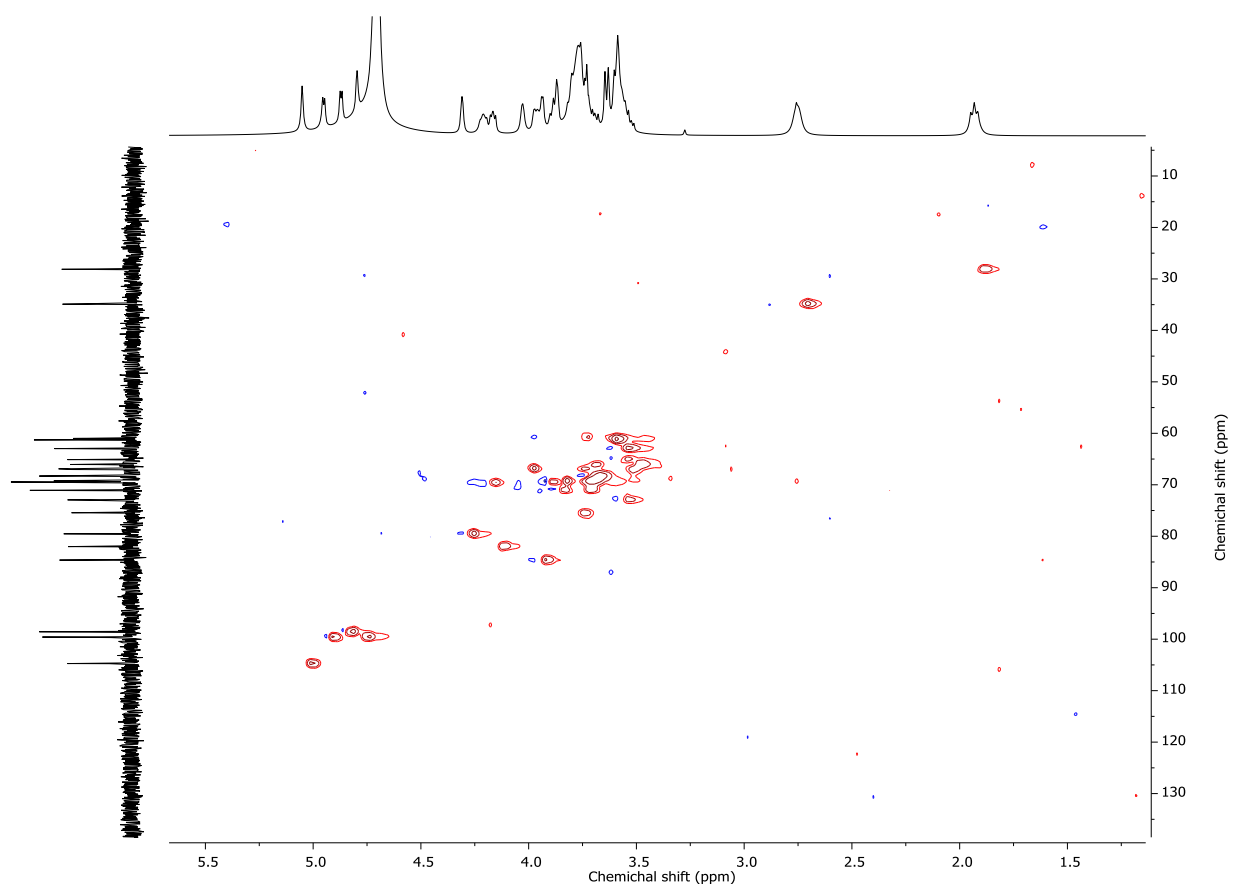

**Figure S27.** HSQC NMR spectrum of G31<sub>SH</sub> in D<sub>2</sub>O. The disulfide form (G31<sub>S</sub>)<sub>2</sub> is likely to be present as well.

## Mass spectrum of compound **G31<sub>SH</sub>**

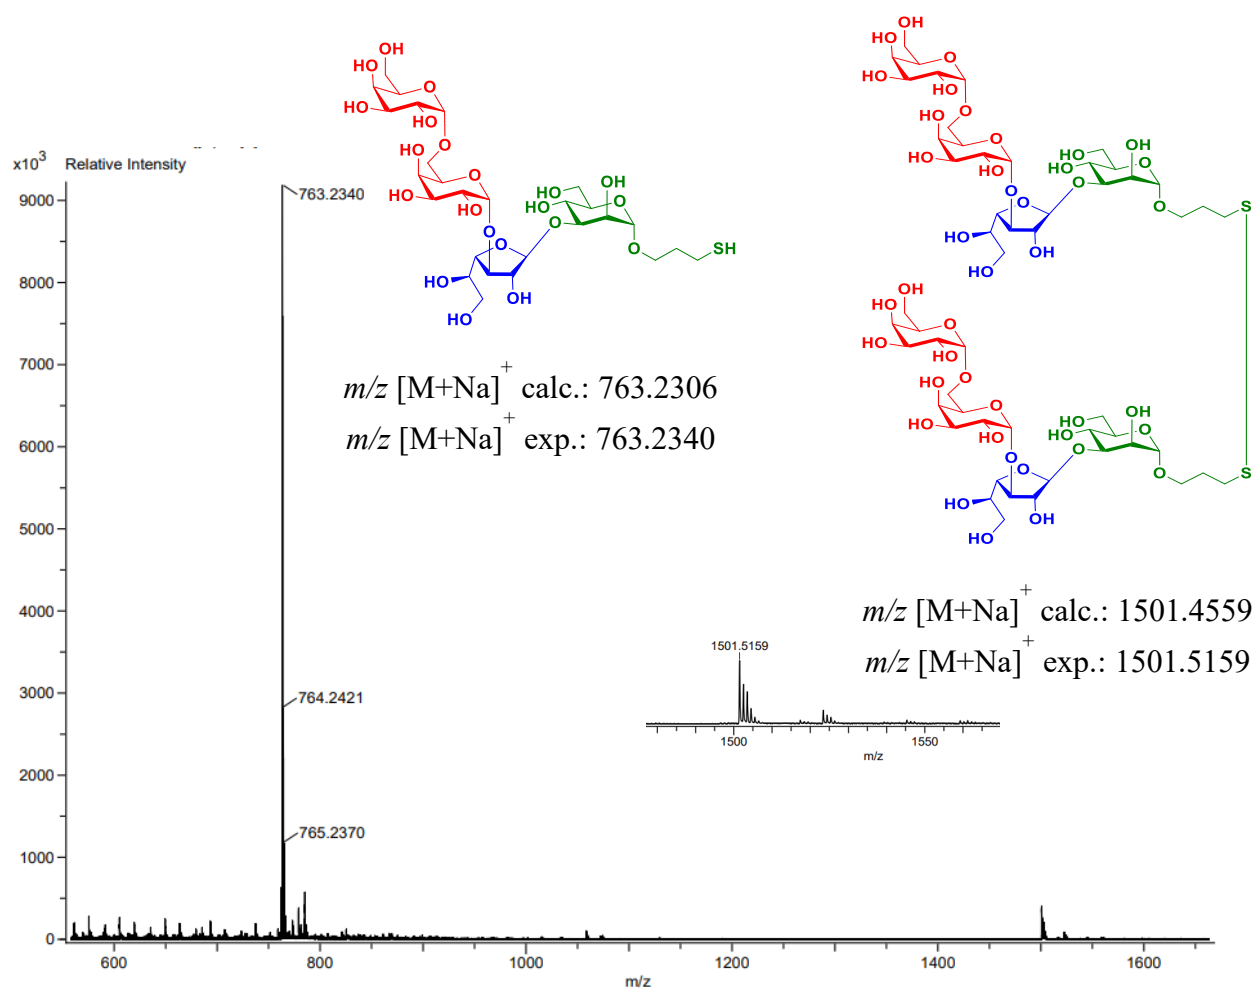

**Figure S28.** ESI-TOF HR MS of compound **G31<sub>SH</sub>**. The disulfide **(G31S)<sub>2</sub>** is also present.

**Supplementary Table 1. Tegumentary Leishmaniasis Cohort**

| <b>Sample #</b>   | <b>Gender</b> | <b>Age</b> | <b>Country</b> |
|-------------------|---------------|------------|----------------|
| X-Le002-A001-0066 | F             | 30         | Bolivia        |
| X-Le002-A001-0112 | F             | 30         | Bolivia        |
| 6117              | F             | 46         | Argentina      |
| 6631              | F             | 41         | Argentina      |
| X-Le002-A001-0008 | M             | 38         | Bolivia        |
| X-Le002-A001-0011 | M             | 21         | Bolivia        |
| X-Le002-A001-0012 | M             | 37         | Bolivia        |
| X-Le002-A001-0013 | M             | 36         | Bolivia        |
| X-Le002-A001-0024 | M             | 24         | Bolivia        |
| X-Le002-A001-0038 | M             | 49         | Bolivia        |
| X-Le002-A001-0108 | M             | 37         | Bolivia        |
| 5915              | M             | 77         | Argentina      |
| 5924              | M             | 46         | Argentina      |
| 6179              | M             | 48         | Argentina      |
| 6185              | M             | 39         | Argentina      |
| 6203              | M             | 57         | Argentina      |
| 6520              | M             | 22         | Argentina      |
| 6575              | M             | 23         | Argentina      |
| 6583              | M             | 14         | Argentina      |
| 6591              | M             | 42         | Argentina      |
| 6597              | M             | 42         | Argentina      |
| 6607              | M             | 33         | Argentina      |
| 6609              | M             | 70         | Argentina      |
| 6611              | M             | 53         | Argentina      |
| 6614              | M             | 52         | Argentina      |
| 6618              | M             | 66         | Argentina      |
| 6629              | M             | 28         | Argentina      |
| 6632              | M             | 14         | Argentina      |

**Supplementary Table 2. Chagas Disease Cohort**

| <b>Patient #</b> | <b>Gender</b> | <b>Age</b> | <b>Country</b> |
|------------------|---------------|------------|----------------|
| T2100505         | F             | 37         | Bolivia        |
| N2100467         | F             | 38         | Bolivia        |
| E2100478         | F             | 25         | Bolivia        |
| V2100488         | F             | 57         | Bolivia        |
| V2100491         | F             | 48         | Bolivia        |
| B2100504         | F             | 33         | Bolivia        |
| B2100505         | F             | 35         | Bolivia        |
| R2100513         | F             | 48         | Bolivia        |
| A2100523         | F             | 40         | Bolivia        |
| F2100524         | F             | 53         | Bolivia        |
| E2100438         | F             | 44         | Bolivia        |
| R2100470         | M             | 40         | Bolivia        |
| S2100485         | M             | 52         | Bolivia        |
| M2100489         | M             | 20         | Bolivia        |
| R2100493         | M             | 48         | Bolivia        |
| R2100497         | M             | 58         | Bolivia        |
| R2100496         | M             | 46         | Bolivia        |
| S1900019         | M             | 53         | Bolivia        |
| S2100427         | M             | 62         | Bolivia        |
| A2100429         | M             | 62         | Bolivia        |
| E2100432         | M             | 37         | Bolivia        |
| B2100434         | M             | 32         | Bolivia        |
| H2100435         | M             | 47         | Bolivia        |
| A2100440         | M             | 35         | Bolivia        |
| G2100493         | M             | 35         | Bolivia        |
| F2100495         | M             | 42         | Bolivia        |
| R2100497         | M             | 75         | Bolivia        |
| S2100501         | M             | 38         | Bolivia        |

**Supplementary Table 3. Negative Controls Cohort (non-TL, non-CD)**

| <b>Patient #</b> | <b>Gender</b> | <b>Age</b> | <b>Country</b> |
|------------------|---------------|------------|----------------|
| V2100499         | F             | 28         | Bolivia        |
| E2100508         | F             | 30         | Bolivia        |
| C2100514         | F             | 53         | Bolivia        |
| I1900024         | F             | 18         | Bolivia        |
| F1900037         | F             | 22         | Bolivia        |
| C1900094         | F             | 18         | Bolivia        |
| H1900128         | F             | 29         | Bolivia        |
| C1200439         | F             | 31         | Bolivia        |
| C2100441         | F             | 29         | Bolivia        |
| S2100526         | F             | 43         | Bolivia        |
| Q2100408         | F             | 27         | Bolivia        |
| R2100383         | F             | 36         | Bolivia        |
| H2100384         | F             | 16         | Bolivia        |
| P2100488         | F             | 66         | Bolivia        |
| C2100474         | M             | 28         | Bolivia        |
| M2100490         | M             | 34         | Bolivia        |
| C2100502         | M             | 29         | Bolivia        |
| T2100525         | M             | 48         | Bolivia        |
| M1900165         | M             | 24         | Bolivia        |
| J2100425         | M             | 28         | Bolivia        |
| H2100433         | M             | 30         | Bolivia        |
| M2100442         | M             | 47         | Bolivia        |
| C2100498         | M             | 32         | Bolivia        |
| M2100500         | M             | 35         | Bolivia        |
| P2100520         | M             | 28         | Bolivia        |
| R2100524         | M             | 51         | Bolivia        |
| C2100540         | M             | 34         | Bolivia        |
| M2100542         | M             | 31         | Bolivia        |
